# Supplementary material for: A combined experimental and computational study of NHC-promoted desulfonylation of tosylated aldimines
Source: Royal Society of Chemistry journal article supplement (doi:10.1039/c9qo01402k), 2019-12-28
Supplement: c9qo01402k1.pdf [file c9qo01402k1.pdf]

## Supporting Information

### **A Combined Experimental and Computational Study on NHC-Promoted Desulfonylation of Tosylated Aldimine**

Fang Sun,<sup>a</sup> Tingrui Yin,<sup>a</sup> Yang Wang,<sup>b</sup> Anni Feng,<sup>a</sup> Liuqing Yang,<sup>a</sup> Wenchao Wu,<sup>a</sup> Chenxia Yu,<sup>a</sup> Tuanjie Li,<sup>\*a</sup> Donghui Wei,<sup>\*c</sup> Changsheng Yao<sup>\*a</sup>

<sup>a</sup>Jiangsu Key Lab of Green Synthetic Chemistry for Functional Materials, School of Chemistry and Materials Science, Jiangsu Normal University, Xuzhou, Jiangsu 221116, P R China

<sup>b</sup>Department of Material and Chemical Engineering, Zhengzhou University of Light Industry, 136 Science Avenue, Zhengzhou, Henan Province, 450002, P. R. China

<sup>c</sup>The College of Chemistry, Zhengzhou University, 100 Science Avenue, Zhengzhou, Henan 450001, P R China

|                                                          |    |
|----------------------------------------------------------|----|
| <b>1 General information</b> .....                       | 2  |
| <b>2 Preparation of Imines</b> .....                     | 3  |
| <b>3 General procedure for the desulfonylation</b> ..... | 4  |
| <b>4 DFT Computational Study on Mechanism</b> .....      | 5  |
| <b>5 Characterization of products</b> .....              | 23 |
| <b>References</b> .....                                  | 51 |

## 1 General information

Unless otherwise mentioned, all reactions were carried out under an atmosphere of nitrogen in dry sealed Schlenk tube and were monitored by analytical thin-layer chromatography (TLC), which was visualized by ultraviolet light (254 nm). All solvents were obtained from commercial sources and were purified according to standard procedures. Purification of the products was accomplished by flash chromatography using silica gel (200-300 mesh). Melting points (°C) are uncorrected. <sup>1</sup>H NMR spectra were measured on a 400 MHz spectrometer in CDCl<sub>3</sub> (100 MHz, <sup>13</sup>C NMR) with a chemical shift ( $\delta$ ) given in ppm relative to TMS as an internal standard. Data are presented as follows: chemical shift (ppm), multiplicity (s = singlet, d = doublet, t = triplet, q = quartet, m = multiplet), coupling constant *J* (Hz), integration. GC-MS was performed on an Agilent 6890-5973N system with electron ionisation (EI) mass spectrometry.

## 2 Preparation of Imines

The starting materials (**1a-1q**, **1t**, **1u**, **1v**, **1x** and **3**),<sup>1a</sup> (**1r**, **1s** and **1w**)<sup>1b</sup> and (**4**, **1y**)<sup>1c, 1d</sup> were prepared according to the known procedures.

### 2.1 Procedures for the synthesis of tosylated imines **1a-1q**, **1t**, **1u**, **1v**, **1x** and **3**

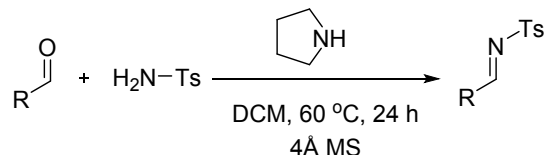

To a solution of 4-methylbenzenesulfonamide (5.8 mmol, 1.0 eq.) in dry DCM (18.0 mL, 0.32 M) were added benzaldehyde (6.96 mmol, 1.2 eq.), molecular sieves of 4Å (1 g/mol) and 10 mol% of pyrrolidine (0.58 mmol, 10 mol%). The mixture was heated to reflux (60 °C) in a seal vial during 24 h. The reaction mixture was filtrated through a pad of Celite and the filtrate was concentrated in vacuo. The product was recrystallized from ethyl acetate and petroleum ether (EA:PE = 1:5) to yield the corresponding pure tosylated imine.

### 2.2 Procedures for the synthesis of tosylated imines **1r**, **1s** and **1w**.

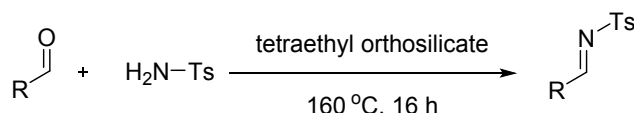

To an oven-dried 50 mL round-bottom flask with a magnetic stirring bar under an nitrogen atmosphere were added 4-methylbenzenesulfonamide (10.0 mmol 1.0 eq.), tetraethyl orthosilicate (20 mL), and the respective aldehyde (10.0 mmol, 1.0 eq.). The flask was connected to a short distillation head and a receptor flask. The reaction mixture was heated at 160 °C for 16 h; the by-product, ethanol, was collected in the receptor flask. The reaction mixture was cooled to room temperature and washed with petroleum ether (10 mL). The mixture was filtered to give a solid, which was recrystallized from ethyl acetate and petroleum ether (EA:PE = 1:5) to yield the corresponding pure tosylated imine.

### 2.3 Procedures for the synthesis of N-Boc imine

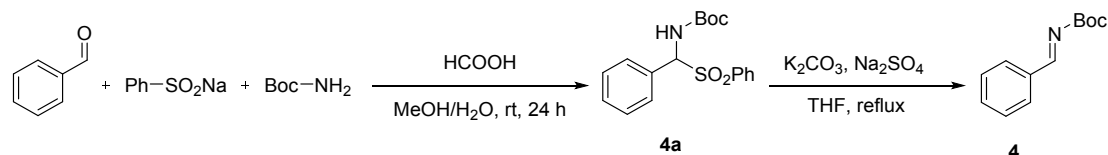

A mixture of benzaldehyde (20.0 mmol, 2.0 eq.), tert-butyl carbamate (10.0 mmol, 1.0 equiv), benzenesulfinic acid sodium salt (25.0 mmol, 2.5 eq.) and formic acid (20.0 mmol, 2.0 eq.) in methanol (10 mL) and water (20 mL) was stirred at room temperature for 24 h. The resulting precipitate was filtered and washed well with diethyl ether. After drying under vacuum, the product **4a** was obtained as a white solid. Then, a THF solution (40 mL) of the obtained product (8 mmol), potassium carbonate (48 mmol), and sodium sulfate (56 mmol) was refluxed for 18 h. The reaction mixture was filtered and concentrated to give the target imine **4**.

### 3 General procedure for the desulfonylation

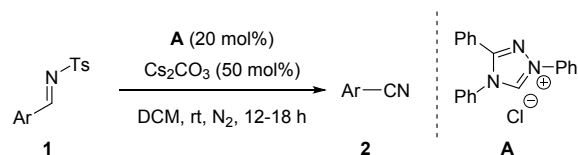

In the glove box filled with nitrogen, an oven-dried 15 mL sealed tube equipped with a magnetic stir bar was charged with **1** (0.5 mmol), trisaryltriazolium salt **A** (0.1 mmol, 33.4 mg), and Cs<sub>2</sub>CO<sub>3</sub> (0.25 mmol, 81.5 mg). Freshly distilled DCM (2.0 mL) was added into the mixture with a syringe under nitrogen. Then the mixture was stirred at rt until completion (monitored by TLC). After concentrated in vacuo (due to the volatility of the product **2**, the system needed to be placed at -20°C), the crude product was purified by flash column chromatography (mixtures of petroleum ether/ethyl acetate, 80:1 to 10:1, v/v) to yield the desired product **2**.

#### 3.1 Procedure for Gram-scale Experiment

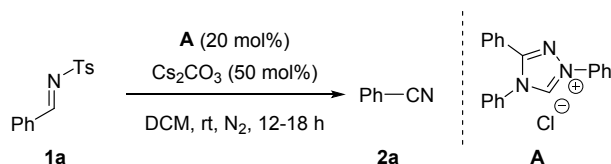

In the glove box filled with nitrogen, an oven-dried 48 mL sealed tube equipped with a magnetic stir bar was charged with the corresponding tosylated aldimine **1a** (10 mmol), trisaryltriazolium salt **A** (2 mmol, 668 mg), and Cs<sub>2</sub>CO<sub>3</sub> (5 mmol, 1.63 g). Freshly distilled DCM (20.0 mL) was added into the mixture with a syringe under nitrogen. Then the mixture was stirred at rt until completion (monitored by TLC). After concentrated in vacuo (due to the volatility of the product **2**, the system needed to be placed at -20°C), the crude product was purified by flash column chromatography (mixtures of petroleum ether/ethyl acetate, 70:1, v/v) to yield the desired product **2a**.

## 4 DFT Computational Study on Mechanism

### Computational Method:

Gaussian 09 program<sup>2</sup> and density functional theory (DFT) were used for all the calculations. All structures were optimized and at the M06-2X/6-31G\*\*<sup>3</sup> level in dichloromethane solvent using the IEFPCM model. Then, frequency calculations at the same level of theory were carried out to identify all of the stationary points as minima (zero imaginary frequencies), and to confirm each transition state has only one imaginary frequency, which connected to the expected intermediates.

**Table S1** The absolute energies (E), zero-point energy (ZPE), E+ZPE, Gibbs free energy correction (GFEC), and GFEC+E of all the stationary points involved in the reaction calculated at the M06-2X/6-31G(d, p)/IEFPCM<sub>dichloromethane</sub> level (Unit in a.u)

|                               | ZPE      | E            | E+ZPE        | GFEC     | GFEC+E       |
|-------------------------------|----------|--------------|--------------|----------|--------------|
| NHC                           | 0.304867 | -935.014442  | -934.709575  | 0.257631 | -934.756811  |
| R1                            | 0.244165 | -1144.314610 | -1144.070445 | 0.198472 | -1144.116138 |
| HCO <sub>3</sub> <sup>-</sup> | 0.026983 | -264.428853  | -264.401870  | 0.001236 | -264.427617  |
| TS1                           | 0.549386 | -2079.323018 | -2078.773632 | 0.481807 | -2078.841211 |
| M1                            | 0.551955 | -2079.363400 | -2078.811445 | 0.485121 | -2078.878279 |
| TS1'                          | 0.545291 | -2079.284105 | -2078.738814 | 0.474650 | -2078.809455 |
| TS2                           | 0.575977 | -2343.788923 | -2343.212946 | 0.504171 | -2343.284752 |
| M2                            | 0.579407 | -2343.792810 | -2343.213403 | 0.504756 | -2343.288054 |
| TS3                           | 0.574773 | -2343.762584 | -2343.187811 | 0.499393 | -2343.263191 |
| M3                            | 0.406838 | -1259.361957 | -1258.955119 | 0.350127 | -1259.01183  |
| TsH                           | 0.166607 | -1084.427699 | -1084.261092 | 0.123074 | -1084.304625 |
| TS4                           | 0.406520 | -1259.361197 | -1258.954677 | 0.349894 | -1259.011303 |
| P                             | 0.100234 | -324.365280  | -324.265046  | 0.069961 | -324.295319  |

### Cartesian Coordinates of the Listed Complexes

#### NHC

0 1

|   |             |             |             |
|---|-------------|-------------|-------------|
| C | 0.97713500  | -1.27460400 | 0.04926400  |
| C | -0.24099400 | 0.64047700  | -0.00397300 |
| N | 0.99892300  | 1.03199200  | -0.01017300 |
| N | 1.71122500  | -0.13924400 | 0.02292300  |
| N | -0.28831600 | -0.74550000 | 0.03657200  |
| C | -1.38535600 | 1.56354800  | -0.08409900 |
| C | -1.32754300 | 2.77535600  | 0.61045400  |
| C | -2.49538000 | 1.27163600  | -0.88410200 |
| C | -2.37599000 | 3.68389900  | 0.51197800  |
| H | -0.45981400 | 2.99512500  | 1.22368900  |
| C | -3.54031000 | 2.18429400  | -0.97824700 |
| H | -2.53548900 | 0.33945400  | -1.43870500 |

|   |             |             |             |
|---|-------------|-------------|-------------|
| C | -3.48410300 | 3.38891000  | -0.27959300 |
| H | -2.32812700 | 4.62161800  | 1.05546100  |
| H | -4.39731300 | 1.95552900  | -1.60276300 |
| H | -4.30182000 | 4.09816800  | -0.35480200 |
| C | -1.45771500 | -1.56488500 | 0.11277900  |
| C | -1.58430400 | -2.62863700 | -0.77565600 |
| C | -2.43417300 | -1.31056300 | 1.07285200  |
| C | -2.70793100 | -3.44629700 | -0.70434400 |
| H | -0.80068300 | -2.80419600 | -1.50433900 |
| C | -3.55916800 | -2.12818200 | 1.12876300  |
| H | -2.30916400 | -0.48549900 | 1.76651700  |
| C | -3.69831200 | -3.19467400 | 0.24271800  |
| H | -2.81028600 | -4.27716500 | -1.39417400 |
| H | -4.32351100 | -1.93552700 | 1.87401600  |
| H | -4.57596900 | -3.83031200 | 0.29261200  |
| C | 3.13521300  | -0.08281400 | 0.00947300  |
| C | 3.86443000  | -1.27214500 | 0.02417300  |
| C | 3.78235800  | 1.15020100  | -0.02230600 |
| C | 5.25311600  | -1.21793300 | 0.00623300  |
| H | 3.33284300  | -2.21555000 | 0.04878500  |
| C | 5.17409500  | 1.18685800  | -0.04059600 |
| H | 3.19856600  | 2.06166700  | -0.03453900 |
| C | 5.91495300  | 0.00847800  | -0.02658500 |
| H | 5.82036000  | -2.14290700 | 0.01720600  |
| H | 5.67846300  | 2.14730700  | -0.06747700 |
| H | 6.99899800  | 0.04401400  | -0.04187700 |

## R1

01

|   |             |             |             |
|---|-------------|-------------|-------------|
| C | -5.23950200 | 1.55738600  | 0.00792500  |
| C | -4.24013000 | 1.73109900  | 0.96923800  |
| C | -3.06654700 | 0.99542300  | 0.89250100  |
| C | -2.88804300 | 0.07954600  | -0.15275700 |
| C | -3.89139500 | -0.09212300 | -1.11199200 |
| C | -5.06684100 | 0.64691900  | -1.03162200 |
| H | -6.15594300 | 2.13504400  | 0.07282400  |
| H | -4.38219200 | 2.44231100  | 1.77579600  |
| H | -2.28031900 | 1.11600600  | 1.63043800  |
| H | -3.74600700 | -0.80563200 | -1.91811600 |
| H | -5.84427600 | 0.51317200  | -1.77573000 |
| C | -1.66626500 | -0.71637600 | -0.27703900 |
| H | -1.60994000 | -1.40858600 | -1.12482900 |
| N | -0.69848200 | -0.61185200 | 0.55725300  |
| S | 0.61901300  | -1.63726700 | 0.27339200  |

|   |            |             |             |
|---|------------|-------------|-------------|
| O | 0.45704700 | -2.38623900 | -0.97312900 |
| O | 0.82244300 | -2.37372600 | 1.51686500  |
| C | 1.92807800 | -0.46864700 | 0.06736900  |
| C | 2.49517100 | -0.29440100 | -1.19000900 |
| C | 3.53558100 | 0.61841900  | -1.33097300 |
| C | 4.00245400 | 1.35366100  | -0.23820200 |
| C | 3.41029300 | 1.15235600  | 1.01544000  |
| C | 2.37480100 | 0.24321700  | 1.17914500  |
| H | 2.13283000 | -0.87300900 | -2.03279400 |
| H | 3.99501100 | 0.75824400  | -2.30489400 |
| H | 3.77220600 | 1.71142200  | 1.87326000  |
| H | 1.92517900 | 0.07750300  | 2.15281700  |
| C | 5.10851900 | 2.36128500  | -0.40445600 |
| H | 5.74502500 | 2.39655000  | 0.48238300  |
| H | 5.72916500 | 2.12682300  | -1.27141500 |
| H | 4.69146900 | 3.36254000  | -0.55207600 |

**TS1**

01

|   |            |             |             |
|---|------------|-------------|-------------|
| C | 1.22242400 | 0.73607000  | -0.25737800 |
| C | 3.43686100 | 0.35770400  | -0.13667300 |
| N | 3.29915300 | 1.64696200  | -0.00663700 |
| N | 1.95001500 | 1.84962200  | -0.08364600 |
| N | 2.18997500 | -0.22429700 | -0.30175300 |
| C | 4.73556100 | -0.33064300 | -0.05356600 |
| C | 5.70745300 | 0.21772200  | 0.79179800  |
| C | 5.03152900 | -1.47594900 | -0.80059400 |
| C | 6.95906200 | -0.37660600 | 0.89372700  |
| H | 5.46711200 | 1.10551300  | 1.36683400  |
| C | 6.28683600 | -2.06648500 | -0.69118200 |
| H | 4.29624800 | -1.89828800 | -1.47592400 |
| C | 7.24963400 | -1.52252100 | 0.15550400  |
| H | 7.70521700 | 0.05090100  | 1.55494700  |
| H | 6.51362000 | -2.95223400 | -1.27483700 |
| H | 8.22554400 | -1.98940300 | 0.23925500  |
| C | 1.91326300 | -1.62096700 | -0.49468000 |
| C | 1.61236600 | -2.07647400 | -1.77437800 |
| C | 1.94503600 | -2.48176100 | 0.59609600  |
| C | 1.33066300 | -3.42740300 | -1.96179700 |
| H | 1.61289700 | -1.37963300 | -2.60731900 |
| C | 1.66052600 | -3.82911400 | 0.39819300  |
| H | 2.16989700 | -2.09040500 | 1.58298000  |
| C | 1.35524900 | -4.30127000 | -0.87739100 |
| H | 1.09464600 | -3.79439300 | -2.95486400 |

|   |             |             |             |
|---|-------------|-------------|-------------|
| H | 1.67039600  | -4.50824800 | 1.24386000  |
| H | 1.13316200  | -5.35280800 | -1.02588000 |
| C | 1.44050700  | 3.18030500  | -0.01628100 |
| C | 0.18074600  | 3.38399800  | 0.53242800  |
| C | 2.20176900  | 4.23596300  | -0.50909600 |
| C | -0.34500800 | 4.67142300  | 0.55704500  |
| H | -0.37485800 | 2.54778200  | 0.94010300  |
| C | 1.67141800  | 5.52155800  | -0.45920600 |
| H | 3.18375500  | 4.04571800  | -0.92652000 |
| C | 0.39788600  | 5.74176700  | 0.06370600  |
| H | -1.33639100 | 4.82641500  | 0.96979300  |
| H | 2.25427500  | 6.35321800  | -0.84093100 |
| H | -0.01118700 | 6.74620700  | 0.08968900  |
| C | -1.47054000 | -2.98113100 | 2.07126000  |
| C | -0.99153500 | -1.74763300 | 2.51342200  |
| C | -0.77243800 | -0.71454800 | 1.60823900  |
| C | -1.03448700 | -0.90893500 | 0.25024200  |
| C | -1.48348600 | -2.15479100 | -0.19302300 |
| C | -1.71095400 | -3.18532200 | 0.71536200  |
| H | -1.64085400 | -3.78348600 | 2.78214000  |
| H | -0.78577900 | -1.59006400 | 3.56735100  |
| H | -0.40419100 | 0.24696600  | 1.94748100  |
| H | -1.66153800 | -2.31556500 | -1.25331300 |
| H | -2.06514800 | -4.14783800 | 0.36043300  |
| C | -0.87846500 | 0.14557200  | -0.80555400 |
| H | -0.38869400 | -0.22148000 | -1.70859000 |
| N | -1.67912500 | 1.15964500  | -1.04525500 |
| S | -2.83079900 | 1.66521200  | 0.02771600  |
| O | -3.35355600 | 2.91447400  | -0.52653000 |
| O | -2.38054400 | 1.68730400  | 1.42703300  |
| C | -4.13011600 | 0.45290000  | -0.09255100 |
| C | -5.01697000 | 0.53382800  | -1.16409800 |
| C | -6.02294400 | -0.41636200 | -1.28109300 |
| C | -6.15560200 | -1.44423700 | -0.33998800 |
| C | -5.25173100 | -1.50070600 | 0.72407300  |
| C | -4.23759600 | -0.55698100 | 0.85814900  |
| H | -4.91976300 | 1.33764700  | -1.88630800 |
| H | -6.71968500 | -0.36019700 | -2.11265200 |
| H | -5.34023600 | -2.29504900 | 1.45994800  |
| H | -3.53435000 | -0.60437800 | 1.68414700  |
| C | -7.27044900 | -2.44962800 | -0.46067400 |
| H | -7.02611300 | -3.37691100 | 0.06160200  |
| H | -8.19252500 | -2.05382900 | -0.02274700 |
| H | -7.47880400 | -2.68334600 | -1.50735800 |



**TS1'**

0 1

|   |             |             |             |
|---|-------------|-------------|-------------|
| C | -1.32460800 | 0.45085800  | -0.11821800 |
| C | -2.61666200 | -1.29468300 | -0.41987400 |
| N | -3.24276300 | -0.28403600 | -0.96481000 |
| N | -2.42529800 | 0.78330000  | -0.77040000 |
| N | -1.41344900 | -0.86576800 | 0.11383900  |
| C | -3.14122600 | -2.66583900 | -0.38337000 |
| C | -2.98715300 | -3.47050600 | 0.75003600  |
| C | -3.84276400 | -3.13827100 | -1.49618700 |
| C | -3.52779700 | -4.75111600 | 0.75891000  |
| H | -2.46205200 | -3.09479700 | 1.62250800  |
| C | -4.38038000 | -4.41998500 | -1.47756100 |
| H | -3.95379300 | -2.50064000 | -2.36702000 |
| C | -4.22006500 | -5.22713000 | -0.35316700 |
| H | -3.41360400 | -5.37556500 | 1.63827800  |
| H | -4.92020100 | -4.78907400 | -2.34282100 |
| H | -4.63765800 | -6.22844300 | -0.34138000 |
| C | -0.36962500 | -1.60710800 | 0.76678600  |
| C | 0.15506000  | -2.74624100 | 0.16504300  |
| C | 0.11624800  | -1.11631400 | 1.97423500  |
| C | 1.19036400  | -3.41683400 | 0.80912900  |
| H | -0.23170200 | -3.09146200 | -0.78775000 |
| C | 1.16963700  | -1.78374100 | 2.59237800  |
| H | -0.32025800 | -0.22731300 | 2.42048200  |
| C | 1.70009600  | -2.93553900 | 2.01555800  |
| H | 1.61119300  | -4.30777700 | 0.35599000  |
| H | 1.56400900  | -1.40044400 | 3.52739000  |
| H | 2.51500700  | -3.45905600 | 2.50426500  |
| C | -2.78071200 | 2.09292000  | -1.22438200 |
| C | -1.76300900 | 3.01777700  | -1.44234800 |
| C | -4.12292700 | 2.39913900  | -1.41538600 |
| C | -2.11783100 | 4.30084900  | -1.84704000 |
| H | -0.72198500 | 2.72565600  | -1.32403800 |
| C | -4.45328600 | 3.68394600  | -1.83391000 |
| H | -4.88237300 | 1.64706200  | -1.23779100 |
| C | -3.45634000 | 4.63490700  | -2.04337600 |
| H | -1.33999700 | 5.03576900  | -2.02204700 |
| H | -5.49514500 | 3.94147400  | -1.98969400 |
| H | -3.72282200 | 5.63608200  | -2.36435200 |
| C | -0.19453100 | 2.35908600  | 4.98711800  |
| C | -0.99892500 | 2.84956000  | 3.95950400  |
| C | -0.56960400 | 2.78268100  | 2.63734700  |

|   |             |             |             |
|---|-------------|-------------|-------------|
| C | 0.69614000  | 2.26453900  | 2.32703700  |
| C | 1.50588300  | 1.78165700  | 3.36823400  |
| C | 1.05538800  | 1.81952300  | 4.68388600  |
| H | -0.54058500 | 2.39204200  | 6.01489500  |
| H | -1.97372600 | 3.27057200  | 4.18594100  |
| H | -1.20888800 | 3.13832700  | 1.83280000  |
| H | 2.47966700  | 1.36504000  | 3.12778100  |
| H | 1.68867900  | 1.43588800  | 5.47833100  |
| C | 1.09742300  | 2.09029300  | 0.92731000  |
| H | -0.45500700 | 1.09409600  | 0.15445200  |
| N | 2.18098900  | 2.41494900  | 0.44522000  |
| S | 2.18359600  | 1.63735200  | -1.50562900 |
| O | 2.63427700  | 2.56673700  | -2.57781900 |
| O | 0.85562700  | 0.97648800  | -1.69779700 |
| C | 3.38203100  | 0.30859500  | -1.45227400 |
| C | 4.56067000  | 0.39687200  | -2.18518000 |
| C | 5.50131100  | -0.62337700 | -2.08230500 |
| C | 5.28804100  | -1.71704000 | -1.23791600 |
| C | 4.10107100  | -1.77310000 | -0.49944600 |
| C | 3.14667900  | -0.76684400 | -0.59796800 |
| H | 4.71871500  | 1.25153500  | -2.83513800 |
| H | 6.41675900  | -0.57195400 | -2.66586500 |
| H | 3.92146100  | -2.61856900 | 0.15921900  |
| H | 2.22347100  | -0.81768300 | -0.02542500 |
| C | 6.32984400  | -2.79791400 | -1.10859900 |
| H | 5.89381100  | -3.72596200 | -0.73266100 |
| H | 6.80559700  | -3.00329400 | -2.07067000 |
| H | 7.11766000  | -2.49378300 | -0.41167400 |

**M1**

01

|   |             |            |             |
|---|-------------|------------|-------------|
| C | -0.84301100 | 0.40404300 | -0.06043800 |
| C | -0.80191500 | 2.56731200 | -0.46702000 |
| N | -1.94173100 | 2.13608100 | -0.93695600 |
| N | -1.94719300 | 0.80158500 | -0.68312900 |
| N | -0.09126900 | 1.51360200 | 0.08211300  |
| C | -0.37217400 | 3.97173800 | -0.51376600 |
| C | -1.35138600 | 4.96069100 | -0.37413900 |
| C | 0.96289200  | 4.32835900 | -0.73065300 |
| C | -0.99298900 | 6.30174900 | -0.44017300 |
| H | -2.38357000 | 4.67000400 | -0.20889900 |
| C | 1.31178200  | 5.67270900 | -0.79425300 |
| H | 1.72245900  | 3.56509100 | -0.86261800 |
| C | 0.33816800  | 6.65864000 | -0.64542000 |

|   |             |             |             |
|---|-------------|-------------|-------------|
| H | -1.75239400 | 7.06739800  | -0.32528300 |
| H | 2.34627600  | 5.94908700  | -0.96624600 |
| H | 0.61725600  | 7.70606500  | -0.69201900 |
| C | 1.18312700  | 1.57498100  | 0.74661300  |
| C | 2.25963100  | 0.90076700  | 0.18353300  |
| C | 1.29697700  | 2.32196000  | 1.91393500  |
| C | 3.49812700  | 0.98803000  | 0.81360200  |
| H | 2.12211800  | 0.32143300  | -0.72487200 |
| C | 2.54191100  | 2.40206200  | 2.52877500  |
| H | 0.43027100  | 2.83255400  | 2.32164900  |
| C | 3.63822300  | 1.73920800  | 1.97867700  |
| H | 4.34719700  | 0.46587000  | 0.38687600  |
| H | 2.65332300  | 2.98083000  | 3.43893900  |
| H | 4.60650600  | 1.80818700  | 2.46274900  |
| C | -3.08259900 | 0.00161400  | -1.05606100 |
| C | -4.29230800 | 0.24479100  | -0.41592000 |
| C | -2.92886600 | -0.98610800 | -2.01985300 |
| C | -5.38567600 | -0.54715200 | -0.74693000 |
| H | -4.36096400 | 1.02157300  | 0.33832800  |
| C | -4.03530900 | -1.76807500 | -2.34094900 |
| H | -1.95495600 | -1.15964400 | -2.46224800 |
| C | -5.25550000 | -1.55222800 | -1.70526100 |
| H | -6.33662600 | -0.38475700 | -0.25164300 |
| H | -3.93717300 | -2.55043000 | -3.08540600 |
| H | -6.11133700 | -2.16975800 | -1.95688100 |
| C | -4.01435100 | -2.17657300 | 2.69053000  |
| C | -3.63124900 | -2.91764200 | 1.57398800  |
| C | -2.49210300 | -2.56798700 | 0.85242100  |
| C | -1.73412600 | -1.46853100 | 1.24284200  |
| C | -2.11049400 | -0.73578900 | 2.36962500  |
| C | -3.24729300 | -1.08508200 | 3.09279300  |
| H | -4.90391800 | -2.45137300 | 3.24836600  |
| H | -4.22464100 | -3.77088700 | 1.26016500  |
| H | -2.19161700 | -3.12653100 | -0.02801100 |
| H | -1.51173700 | 0.11880800  | 2.68294100  |
| H | -3.53219800 | -0.50847400 | 3.96714500  |
| C | -0.52302500 | -0.98711600 | 0.42976000  |
| H | 0.30773900  | -0.85849900 | 1.14551700  |
| N | -0.16481200 | -1.74179700 | -0.75024800 |
| S | 0.72448700  | -3.02318200 | -0.46534300 |
| O | 0.57140300  | -3.95057800 | -1.59895800 |
| O | 0.53474600  | -3.58225400 | 0.88971100  |
| C | 2.45773200  | -2.54695700 | -0.50897700 |
| C | 2.99063600  | -2.02132000 | -1.68746500 |

|   |            |             |             |
|---|------------|-------------|-------------|
| C | 4.33567100 | -1.68200900 | -1.74137500 |
| C | 5.17202600 | -1.87023600 | -0.63103700 |
| C | 4.61824700 | -2.39391100 | 0.53745300  |
| C | 3.26548500 | -2.72854800 | 0.60599700  |
| H | 2.34984400 | -1.88756200 | -2.55472800 |
| H | 4.75326900 | -1.27803600 | -2.65996100 |
| H | 5.25292700 | -2.54619900 | 1.40649000  |
| H | 2.83357300 | -3.14634400 | 1.50876600  |
| C | 6.62693400 | -1.48267800 | -0.69776900 |
| H | 7.19754400 | -1.94983100 | 0.10748900  |
| H | 7.06961300 | -1.77819600 | -1.65234100 |
| H | 6.74611100 | -0.39740500 | -0.60577500 |

**HCO<sub>3</sub><sup>-</sup>**

-1 1

|   |             |             |             |
|---|-------------|-------------|-------------|
| C | -0.13997300 | 0.06463100  | 0.00022800  |
| O | 0.99783600  | -0.76923200 | 0.00010900  |
| O | 0.10788200  | 1.28854000  | -0.00008800 |
| O | -1.21813600 | -0.54874700 | -0.00020400 |
| H | 1.73917700  | -0.15228200 | 0.00009400  |

**TS2**

-1 1

|   |            |             |             |
|---|------------|-------------|-------------|
| C | 0.75197500 | 0.58053000  | -0.55709100 |
| C | 2.96441300 | 0.77559300  | -0.43267700 |
| N | 2.52061100 | 1.99441300  | -0.43587900 |
| N | 1.16278400 | 1.87262000  | -0.55641700 |
| N | 1.93040900 | -0.13084900 | -0.55567800 |
| C | 4.39696700 | 0.45829400  | -0.30978200 |
| C | 5.18179100 | 1.30804400  | 0.47713700  |
| C | 4.99118600 | -0.61815600 | -0.97647600 |
| C | 6.54843200 | 1.08375900  | 0.59626300  |
| H | 4.70563700 | 2.13480900  | 0.99335200  |
| C | 6.35903500 | -0.83763600 | -0.85062600 |
| H | 4.39019200 | -1.27763500 | -1.59293700 |
| C | 7.13897100 | 0.00908600  | -0.06548400 |
| H | 7.15098800 | 1.74357800  | 1.21165000  |
| H | 6.81737900 | -1.67212500 | -1.37069400 |
| H | 8.20498900 | -0.16935700 | 0.03155600  |
| C | 2.08812100 | -1.54750800 | -0.36662700 |
| C | 1.92355700 | -2.41671800 | -1.43948100 |
| C | 2.49679300 | -2.00016300 | 0.88105500  |
| C | 2.17211300 | -3.77066800 | -1.25109700 |
| H | 1.58031100 | -2.02851300 | -2.39034400 |

|   |             |             |             |
|---|-------------|-------------|-------------|
| C | 2.74464900  | -3.35886000 | 1.05869200  |
| H | 2.63178000  | -1.28273900 | 1.68453100  |
| C | 2.58289000  | -4.24143900 | -0.00447600 |
| H | 2.03740200  | -4.46065400 | -2.07721400 |
| H | 3.06661000  | -3.72330700 | 2.02851400  |
| H | 2.77708500  | -5.29991100 | 0.13686700  |
| C | 0.41767800  | 3.07492200  | -0.72097600 |
| C | 0.65469500  | 4.12057200  | 0.16577600  |
| C | -0.50820800 | 3.19305800  | -1.75224400 |
| C | -0.06685100 | 5.30109000  | 0.02760600  |
| H | 1.38461000  | 3.98796500  | 0.95706500  |
| C | -1.23822400 | 4.37087900  | -1.86786900 |
| H | -0.66472100 | 2.36229400  | -2.43199900 |
| C | -1.02043100 | 5.42407700  | -0.98108100 |
| H | 0.10688000  | 6.11973800  | 0.71805100  |
| H | -1.97790200 | 4.46546700  | -2.65586400 |
| H | -1.59145800 | 6.34164400  | -1.07856400 |
| C | -3.88339500 | 2.66975100  | 0.30875600  |
| C | -3.89713200 | 1.80592000  | -0.78483700 |
| C | -2.81632600 | 0.96413900  | -1.03017700 |
| C | -1.70237400 | 0.95540500  | -0.18412900 |
| C | -1.70866600 | 1.81487200  | 0.92388800  |
| C | -2.77809400 | 2.67141000  | 1.15938200  |
| H | -4.72487700 | 3.32868300  | 0.50141300  |
| H | -4.75586700 | 1.78531400  | -1.45095700 |
| H | -2.82035900 | 0.28401900  | -1.87509700 |
| H | -0.84468700 | 1.83112100  | 1.58442000  |
| H | -2.75279500 | 3.33831600  | 2.01672000  |
| C | -0.56092600 | -0.00109300 | -0.41339900 |
| H | -0.34848500 | -0.42932400 | 0.94738000  |
| N | -0.79050500 | -1.04758900 | -1.39417400 |
| S | -1.37483900 | -2.41424500 | -0.85821200 |
| O | -0.69644900 | -2.99198700 | 0.32184900  |
| O | -1.51968100 | -3.32135900 | -2.01891900 |
| C | -3.05561100 | -2.12152600 | -0.28429800 |
| C | -4.11986000 | -2.20696000 | -1.17571200 |
| C | -5.39323900 | -1.81834300 | -0.76875300 |
| C | -5.61759500 | -1.33359200 | 0.52246800  |
| C | -4.53914500 | -1.27826000 | 1.41064400  |
| C | -3.26386000 | -1.66869300 | 1.01719900  |
| H | -3.94069500 | -2.57727100 | -2.18053100 |
| H | -6.22636500 | -1.88738300 | -1.46418800 |
| H | -4.70157200 | -0.91234900 | 2.42178800  |
| H | -2.42113200 | -1.60419500 | 1.69992400  |

|   |             |             |            |
|---|-------------|-------------|------------|
| C | -6.98196600 | -0.84992200 | 0.94230300 |
| H | -7.19725300 | -1.11712000 | 1.98021100 |
| H | -7.04132400 | 0.24158600  | 0.86676700 |
| H | -7.76609900 | -1.26995600 | 0.30781500 |
| C | 0.61463600  | -0.00483100 | 2.74429000 |
| O | 0.69057000  | -0.30993700 | 4.06843100 |
| O | 1.38657200  | 0.82876500  | 2.26535800 |
| O | -0.29840400 | -0.67165800 | 2.14727600 |
| H | 1.39919400  | 0.24228100  | 4.42583700 |

## M2

-1 1

|   |             |             |             |
|---|-------------|-------------|-------------|
| C | 0.63774600  | 0.52994600  | -0.56658100 |
| C | 2.82379800  | 0.68701600  | -0.07279200 |
| N | 2.37625600  | 1.87911900  | 0.14483300  |
| N | 1.03053900  | 1.84290000  | -0.23497400 |
| N | 1.86825000  | -0.16697200 | -0.58510300 |
| C | 4.23021200  | 0.32166600  | 0.17718600  |
| C | 4.83400400  | 0.75249500  | 1.36069200  |
| C | 4.97996900  | -0.39009400 | -0.76519600 |
| C | 6.17774100  | 0.48050200  | 1.59782700  |
| H | 4.23416500  | 1.28142500  | 2.09242000  |
| C | 6.32265100  | -0.66018900 | -0.52256300 |
| H | 4.51445500  | -0.72689300 | -1.68595700 |
| C | 6.92397400  | -0.22623300 | 0.65765300  |
| H | 6.63961000  | 0.81421500  | 2.52142000  |
| H | 6.90039300  | -1.20966300 | -1.25858800 |
| H | 7.97091500  | -0.44220900 | 0.84520700  |
| C | 2.09568200  | -1.54256300 | -0.88542200 |
| C | 2.01126300  | -1.97433900 | -2.20796000 |
| C | 2.47358000  | -2.41648400 | 0.12916800  |
| C | 2.30388500  | -3.29667700 | -2.51676000 |
| H | 1.70084700  | -1.27140200 | -2.97418100 |
| C | 2.77396700  | -3.73949000 | -0.19108900 |
| H | 2.50216700  | -2.04770800 | 1.14934200  |
| C | 2.69040500  | -4.18105200 | -1.50850200 |
| H | 2.23130400  | -3.63939100 | -3.54389800 |
| H | 3.06606000  | -4.42762500 | 0.59576100  |
| H | 2.92149300  | -5.21327700 | -1.75174000 |
| C | 0.49163300  | 3.04743300  | -0.72648900 |
| C | 0.76886300  | 4.23353100  | -0.03896200 |
| C | -0.30967700 | 3.08168000  | -1.87178200 |
| C | 0.24343800  | 5.43773000  | -0.49301300 |
| H | 1.39505600  | 4.19424600  | 0.84528200  |

|   |             |             |             |
|---|-------------|-------------|-------------|
| C | -0.83901700 | 4.29120600  | -2.30840900 |
| H | -0.52108900 | 2.16104600  | -2.40357600 |
| C | -0.56891600 | 5.47523800  | -1.62552900 |
| H | 0.46475000  | 6.35194200  | 0.04909300  |
| H | -1.46356900 | 4.30461700  | -3.19623900 |
| H | -0.98538800 | 6.41548800  | -1.97128200 |
| C | -4.24481000 | 2.26954600  | -0.13006800 |
| C | -4.13180600 | 1.32913700  | -1.15320400 |
| C | -2.94325500 | 0.63242900  | -1.33419400 |
| C | -1.83694700 | 0.85228300  | -0.49986600 |
| C | -1.96433200 | 1.79902700  | 0.52805600  |
| C | -3.15377300 | 2.49818800  | 0.70706100  |
| H | -5.17384300 | 2.81244200  | 0.01732200  |
| H | -4.97625300 | 1.13099800  | -1.80787200 |
| H | -2.86029100 | -0.12334300 | -2.10952300 |
| H | -1.13135100 | 1.96964700  | 1.20306100  |
| H | -3.23238200 | 3.22099400  | 1.51436700  |
| C | -0.61980800 | 0.02415600  | -0.69530300 |
| H | -0.38421500 | -0.97059300 | 2.03640400  |
| N | -0.79047800 | -1.31681600 | -1.14040200 |
| S | -1.26699400 | -2.35550100 | -0.06818800 |
| O | -0.58793500 | -2.23636100 | 1.27520800  |
| O | -1.20596400 | -3.71346200 | -0.63259200 |
| C | -2.99900600 | -2.07896200 | 0.32099400  |
| C | -3.96348800 | -2.59601700 | -0.53754300 |
| C | -5.29944300 | -2.24452400 | -0.36466700 |
| C | -5.68467200 | -1.37003000 | 0.65364000  |
| C | -4.70153600 | -0.87808200 | 1.51808600  |
| C | -3.36639500 | -1.22647900 | 1.35990400  |
| H | -3.66081600 | -3.26566300 | -1.33661300 |
| H | -6.05300000 | -2.64772200 | -1.03621300 |
| H | -4.98647100 | -0.19804500 | 2.31705300  |
| H | -2.61215200 | -0.81649800 | 2.02307200  |
| C | -7.11772800 | -0.93103500 | 0.80703700  |
| H | -7.44610200 | -1.00226900 | 1.84770800  |
| H | -7.23016200 | 0.11517900  | 0.50171700  |
| H | -7.78835100 | -1.53490200 | 0.19190500  |
| C | 0.83013600  | 0.42118300  | 2.59344100  |
| O | 0.78923000  | 1.73613100  | 2.87724700  |
| O | 1.87548700  | -0.18179800 | 2.43958200  |
| O | -0.37861400 | -0.07292200 | 2.53815000  |
| H | 1.69649600  | 2.05982100  | 2.77520900  |

Pre-TS3

-1 1

|   |             |             |             |
|---|-------------|-------------|-------------|
| C | 1.30390000  | -0.34988000 | -0.18557000 |
| C | 3.33075800  | -1.31181700 | -0.30836600 |
| N | 2.51157100  | -2.30360400 | -0.29587600 |
| N | 1.23906100  | -1.75180000 | -0.23207300 |
| N | 2.69838500  | -0.05764900 | -0.30901200 |
| C | 4.78945200  | -1.48225800 | -0.36405500 |
| C | 5.36685200  | -2.61000300 | 0.22845700  |
| C | 5.59875900  | -0.55812000 | -1.03138400 |
| C | 6.74002100  | -2.81113700 | 0.15083300  |
| H | 4.72885800  | -3.31646200 | 0.74928000  |
| C | 6.97269300  | -0.76328700 | -1.10378400 |
| H | 5.14852900  | 0.30784600  | -1.50443600 |
| C | 7.54605700  | -1.88719000 | -0.51243600 |
| H | 7.18319100  | -3.68648500 | 0.61423900  |
| H | 7.59585100  | -0.04593800 | -1.62765600 |
| H | 8.61859900  | -2.04270500 | -0.56809500 |
| C | 3.25557500  | 0.98380000  | 0.52251300  |
| C | 3.73687700  | 2.15600500  | -0.04841500 |
| C | 3.28786500  | 0.80231600  | 1.90366700  |
| C | 4.25069500  | 3.15850900  | 0.76991300  |
| H | 3.68217000  | 2.28266000  | -1.12446300 |
| C | 3.80810600  | 1.80337200  | 2.71812300  |
| H | 2.89541200  | -0.11808400 | 2.32802400  |
| C | 4.28808100  | 2.98309300  | 2.15156000  |
| H | 4.61784500  | 4.07856600  | 0.32699100  |
| H | 3.83738100  | 1.66266200  | 3.79363600  |
| H | 4.68822700  | 3.76592500  | 2.78771600  |
| C | 0.17553500  | -2.53248100 | -0.72735500 |
| C | -0.79208300 | -1.98406300 | -1.57255900 |
| C | 0.10524600  | -3.88167100 | -0.36596800 |
| C | -1.83587500 | -2.78121100 | -2.02895000 |
| H | -0.74377500 | -0.93618900 | -1.84348900 |
| C | -0.93962300 | -4.66941300 | -0.83761400 |
| H | 0.86863600  | -4.29491600 | 0.28424000  |
| C | -1.92017600 | -4.12377700 | -1.66565800 |
| H | -2.59373500 | -2.33759100 | -2.66752800 |
| H | -0.99028600 | -5.71445400 | -0.54752400 |
| H | -2.74300300 | -4.73733100 | -2.01750900 |
| C | 0.89609000  | 4.72563400  | -0.41836800 |
| C | 0.50870400  | 4.22504000  | 0.82584900  |
| C | 0.29523900  | 2.86262300  | 0.99741200  |
| C | 0.48321100  | 1.97383100  | -0.06804200 |
| C | 0.84337900  | 2.48879400  | -1.31769600 |



|   |             |             |             |
|---|-------------|-------------|-------------|
| C | 1.05415300  | 3.85438100  | -1.49268100 |
| H | 1.06026800  | 5.79073500  | -0.54988700 |
| H | 0.37595100  | 4.90227300  | 1.66424200  |
| H | -0.01029300 | 2.46743700  | 1.96148900  |
| H | 0.96338600  | 1.80118100  | -2.15107600 |
| H | 1.33667800  | 4.23732800  | -2.46886700 |
| C | 0.29950500  | 0.51291000  | 0.11741800  |
| N | -0.87690700 | -0.02120300 | 0.69215200  |
| S | -2.25533000 | 0.53233000  | 0.24690500  |
| O | -2.44769900 | 0.69993300  | -1.23959500 |
| O | -2.72329100 | 1.79396100  | 0.92010400  |
| C | -3.40348000 | -0.70941600 | 0.80720900  |
| C | -4.73499500 | -0.32509400 | 0.96686300  |
| C | -5.68043100 | -1.27726400 | 1.32329800  |
| C | -5.31489100 | -2.61284600 | 1.52938100  |
| C | -3.97558900 | -2.97035600 | 1.36468600  |
| C | -3.01521100 | -2.02988100 | 0.99994700  |
| H | -5.02177300 | 0.71302900  | 0.82585600  |
| H | -6.71838500 | -0.98103900 | 1.44870100  |
| H | -3.67476900 | -4.00346800 | 1.51731100  |
| H | -1.97634600 | -2.31181100 | 0.86491400  |
| C | -6.34942100 | -3.63030300 | 1.93451600  |
| H | -6.69767500 | -3.44446900 | 2.95541900  |
| H | -7.22342400 | -3.58338900 | 1.27910500  |
| H | -5.94428300 | -4.64348900 | 1.89569700  |
| C | -5.13394700 | 2.92692700  | -1.30819100 |
| O | -4.56512300 | 1.96350200  | -2.02404400 |
| O | -4.62661200 | 3.19220500  | -0.10712900 |
| O | -6.09431100 | 3.53655500  | -1.72762300 |
| H | -3.73270600 | 1.55014900  | -1.64443000 |
| H | -3.83992800 | 2.63670800  | 0.18025600  |

**TS3**

-1 1

|   |            |             |             |
|---|------------|-------------|-------------|
| C | 1.48446800 | -0.17580900 | -0.45632800 |
| C | 3.44451000 | -1.25070100 | -0.41415900 |
| N | 2.57804900 | -2.14471000 | -0.77526600 |
| N | 1.37700000 | -1.48092800 | -0.83665600 |
| N | 2.85208800 | -0.00718300 | -0.25497700 |
| C | 4.86616000 | -1.55528600 | -0.19276700 |
| C | 5.19894100 | -2.79732700 | 0.35814600  |
| C | 5.87755900 | -0.65866300 | -0.54834400 |
| C | 6.53236000 | -3.13517100 | 0.55676600  |
| H | 4.40471000 | -3.48382600 | 0.63189500  |

|   |             |             |             |
|---|-------------|-------------|-------------|
| C | 7.21004900  | -1.00191800 | -0.34458100 |
| H | 5.62645900  | 0.29497200  | -0.99790800 |
| C | 7.53961900  | -2.23663300 | 0.20973800  |
| H | 6.78478200  | -4.09765200 | 0.98918900  |
| H | 7.99216100  | -0.30454100 | -0.62534500 |
| H | 8.58028900  | -2.49863000 | 0.37042800  |
| C | 3.38361100  | 1.06344300  | 0.54480500  |
| C | 4.01007700  | 2.14955200  | -0.05577300 |
| C | 3.21490200  | 1.00042200  | 1.92473700  |
| C | 4.48550100  | 3.18612000  | 0.74148200  |
| H | 4.10250500  | 2.18526700  | -1.13640900 |
| C | 3.69024500  | 2.04215800  | 2.71542300  |
| H | 2.70471500  | 0.14840500  | 2.36322700  |
| C | 4.32414700  | 3.13326800  | 2.12447100  |
| H | 4.97252900  | 4.03820800  | 0.27981000  |
| H | 3.56217900  | 2.00171900  | 3.79170300  |
| H | 4.68938300  | 3.94627800  | 2.74319700  |
| C | 0.23596900  | -2.16165500 | -1.31231200 |
| C | -0.78942100 | -1.46324900 | -1.95026500 |
| C | 0.15492700  | -3.54522900 | -1.13281100 |
| C | -1.90767800 | -2.16017500 | -2.39966700 |
| H | -0.72047900 | -0.39020600 | -2.08937300 |
| C | -0.96431400 | -4.22668800 | -1.59556300 |
| H | 0.96278600  | -4.06554600 | -0.63195500 |
| C | -2.00025900 | -3.53803100 | -2.22760800 |
| H | -2.71453700 | -1.60145700 | -2.86003800 |
| H | -1.03052800 | -5.30030900 | -1.45126900 |
| H | -2.87881600 | -4.07301400 | -2.57258800 |
| C | 0.87378200  | 4.93683500  | -0.76228100 |
| C | 0.21752500  | 4.47727000  | 0.38115800  |
| C | 0.08786000  | 3.11395100  | 0.61697900  |
| C | 0.62593600  | 2.18116700  | -0.27869200 |
| C | 1.25526100  | 2.65259600  | -1.43738500 |
| C | 1.38512100  | 4.01806000  | -1.67616500 |
| H | 0.97149900  | 6.00238000  | -0.94559700 |
| H | -0.19447900 | 5.18880900  | 1.09071600  |
| H | -0.44264500 | 2.73875600  | 1.48609400  |
| H | 1.64327600  | 1.93604000  | -2.15928900 |
| H | 1.87666800  | 4.36482800  | -2.58062400 |
| C | 0.45656300  | 0.72603600  | -0.02465000 |
| N | -0.54278300 | 0.17693700  | 0.63596400  |
| S | -2.42989300 | 0.54158800  | -0.05320200 |
| O | -3.13892300 | 0.58014800  | -1.42449700 |
| O | -2.89250300 | 1.78243800  | 0.70546900  |

|   |             |             |             |
|---|-------------|-------------|-------------|
| C | -3.27053000 | -0.79040400 | 0.82721200  |
| C | -4.53769700 | -0.54389400 | 1.35262600  |
| C | -5.24610000 | -1.58160900 | 1.94531800  |
| C | -4.70280700 | -2.86952100 | 2.02643300  |
| C | -3.42955100 | -3.09040000 | 1.49835500  |
| C | -2.70982400 | -2.05968000 | 0.89666600  |
| H | -4.95336600 | 0.45866500  | 1.30754700  |
| H | -6.23519700 | -1.39388300 | 2.35570900  |
| H | -2.99213300 | -4.08404700 | 1.55632600  |
| H | -1.71548200 | -2.22893900 | 0.49641500  |
| C | -5.47766500 | -3.98009400 | 2.68830200  |
| H | -5.54825800 | -3.81623000 | 3.76834700  |
| H | -6.49889500 | -4.03125400 | 2.30040000  |
| H | -5.00011000 | -4.94864500 | 2.52569700  |
| C | -6.00235300 | 2.25341300  | -0.71912100 |
| O | -5.58297700 | 1.20605400  | -1.41444000 |
| O | -5.15537100 | 2.80464900  | 0.14548400  |
| O | -7.12911800 | 2.69156900  | -0.85103000 |
| H | -4.57768600 | 1.00124600  | -1.36901800 |
| H | -4.25374400 | 2.34659900  | 0.26172900  |

**M3**

0 1

|   |             |             |             |
|---|-------------|-------------|-------------|
| C | -0.49670600 | 0.25211400  | -0.11535500 |
| C | 1.59014800  | 0.95757300  | 0.18036300  |
| N | 0.85252700  | 2.02907600  | 0.22321000  |
| N | -0.42938900 | 1.58179900  | 0.06242000  |
| N | 0.79484300  | -0.16166000 | 0.00161800  |
| C | 3.05122900  | 0.96310700  | 0.34194000  |
| C | 3.77069100  | 2.05716100  | -0.14846600 |
| C | 3.71587300  | -0.07065900 | 1.01021700  |
| C | 5.14888500  | 2.11269600  | 0.02379400  |
| H | 3.24321100  | 2.85241000  | -0.66453500 |
| C | 5.09492100  | -0.00764000 | 1.17732000  |
| H | 3.15950900  | -0.91251700 | 1.40923000  |
| C | 5.81247000  | 1.07972600  | 0.68345100  |
| H | 5.70524500  | 2.96074900  | -0.36089500 |
| H | 5.60824700  | -0.80812500 | 1.69895200  |
| H | 6.88864600  | 1.12322300  | 0.81455900  |
| C | 1.22166700  | -1.50467900 | -0.26210500 |
| C | 0.80655800  | -2.53057900 | 0.57933800  |
| C | 2.03198700  | -1.74603100 | -1.36728600 |
| C | 1.22113200  | -3.83142000 | 0.30678300  |
| H | 0.17488500  | -2.30854500 | 1.43292100  |

|   |             |             |             |
|---|-------------|-------------|-------------|
| C | 2.44836500  | -3.04821500 | -1.62205200 |
| H | 2.32346300  | -0.92389800 | -2.01268100 |
| C | 2.04388900  | -4.08876100 | -0.78733900 |
| H | 0.90424900  | -4.64148000 | 0.95440800  |
| H | 3.08178000  | -3.25096400 | -2.47865500 |
| H | 2.36829600  | -5.10333800 | -0.99266000 |
| C | -1.50112300 | 2.51660100  | 0.00485200  |
| C | -2.79207900 | 2.11272300  | 0.33664400  |
| C | -1.22949100 | 3.82542700  | -0.38723200 |
| C | -3.82746400 | 3.03839100  | 0.25863100  |
| H | -2.98530200 | 1.09557600  | 0.65927500  |
| C | -2.27449200 | 4.74065300  | -0.44842600 |
| H | -0.21541100 | 4.11031200  | -0.63982100 |
| C | -3.57395600 | 4.35128900  | -0.13098000 |
| H | -4.83521000 | 2.72921300  | 0.51402600  |
| H | -2.06973900 | 5.76141800  | -0.75307600 |
| H | -4.38553000 | 5.06883700  | -0.18547800 |
| C | -4.31598000 | -3.06773300 | 1.17781700  |
| C | -4.31132000 | -3.03415800 | -0.21823000 |
| C | -3.42039300 | -2.21002900 | -0.89407100 |
| C | -2.52041600 | -1.41033300 | -0.18430700 |
| C | -2.53105300 | -1.44599300 | 1.21066200  |
| C | -3.42525400 | -2.27061400 | 1.89150600  |
| H | -5.01252400 | -3.71176400 | 1.70511400  |
| H | -5.00538000 | -3.65418500 | -0.77731000 |
| H | -3.39567200 | -2.16561300 | -1.97889600 |
| H | -1.83725000 | -0.82041200 | 1.77118400  |
| H | -3.42596600 | -2.28917200 | 2.97675800  |
| C | -1.57136100 | -0.54516200 | -0.95256900 |
| N | -1.40225300 | -0.34699400 | -2.15607800 |

**H<sub>2</sub>CO<sub>3</sub>- Ts<sup>-</sup>**

-1 1

|   |             |             |             |
|---|-------------|-------------|-------------|
| S | -1.16796700 | -1.87877200 | -0.01764700 |
| O | -1.82266700 | -1.30077800 | 1.24795100  |
| O | -1.84044600 | -1.27547700 | -1.26148300 |
| C | 0.42240600  | -1.00985100 | -0.01829500 |
| C | 1.01062400  | -0.64294800 | -1.22284700 |
| C | 2.25517100  | -0.01669400 | -1.21606500 |
| C | 2.92156300  | 0.24441100  | -0.01696700 |
| C | 2.30957400  | -0.13183700 | 1.18457200  |
| C | 1.06776300  | -0.75530600 | 1.19013500  |
| H | 0.48216800  | -0.82835000 | -2.15277700 |
| H | 2.71295400  | 0.28072000  | -2.15577800 |

|   |             |             |             |
|---|-------------|-------------|-------------|
| H | 2.81267200  | 0.07564400  | 2.12573200  |
| H | 0.58124200  | -1.02608300 | 2.12222200  |
| C | 4.26153400  | 0.93402800  | -0.00250700 |
| H | 4.18120900  | 1.92849500  | 0.44732300  |
| H | 4.98794700  | 0.36786500  | 0.58751500  |
| H | 4.65854500  | 1.05200200  | -1.01278700 |
| C | -1.80464000 | 1.92378300  | 0.03399600  |
| O | -1.77862400 | 1.23625100  | 1.16780900  |
| O | -1.88116200 | 1.25988400  | -1.11179000 |
| O | -1.76020100 | 3.14051300  | 0.04414300  |
| H | -1.83522100 | 0.21555800  | 1.11920500  |
| H | -1.89320000 | 0.23783600  | -1.08348400 |

**TS4**

0 1

|   |             |             |             |
|---|-------------|-------------|-------------|
| C | 0.48260800  | 0.29032300  | -0.05245000 |
| C | -1.65521800 | 0.92273300  | -0.18471900 |
| N | -0.96817400 | 2.02780200  | -0.20737100 |
| N | 0.33772000  | 1.62369200  | -0.14162500 |
| N | -0.79990000 | -0.16402500 | -0.11414000 |
| C | -3.12186900 | 0.86701300  | -0.26936200 |
| C | -3.86539100 | 1.88825000  | 0.33004400  |
| C | -3.77246400 | -0.15442800 | -0.96955900 |
| C | -5.25233400 | 1.88285300  | 0.23514500  |
| H | -3.34875500 | 2.67532400  | 0.86918400  |
| C | -5.16014200 | -0.15298300 | -1.05928100 |
| H | -3.19846400 | -0.93915100 | -1.45162900 |
| C | -5.90109100 | 0.86146500  | -0.45642900 |
| H | -5.82625800 | 2.67394200  | 0.70575000  |
| H | -5.66278200 | -0.94429700 | -1.60488400 |
| H | -6.98378000 | 0.85664800  | -0.52698400 |
| C | -1.15021600 | -1.53633100 | 0.10074700  |
| C | -0.68852300 | -2.50450900 | -0.78386300 |
| C | -1.92088300 | -1.86991500 | 1.21113700  |
| C | -1.01406500 | -3.83845200 | -0.55202700 |
| H | -0.08932200 | -2.21211300 | -1.63959300 |
| C | -2.24935600 | -3.20406600 | 1.42509000  |
| H | -2.24881700 | -1.09250900 | 1.89357800  |
| C | -1.79638600 | -4.18714800 | 0.54651200  |
| H | -0.65815700 | -4.60243800 | -1.23453800 |
| H | -2.85019900 | -3.47625200 | 2.28587300  |
| H | -2.05029600 | -5.22717100 | 0.72160900  |
| C | 1.37368200  | 2.59711900  | -0.08949000 |
| C | 2.68367300  | 2.22628000  | -0.38601700 |

|   |            |             |             |
|---|------------|-------------|-------------|
| C | 1.05734700 | 3.90678900  | 0.26495700  |
| C | 3.68902300 | 3.18467400  | -0.31455600 |
| H | 2.91319200 | 1.20632400  | -0.67380700 |
| C | 2.07356200 | 4.85457500  | 0.32203100  |
| H | 0.03120000 | 4.16769500  | 0.49244500  |
| C | 3.38977800 | 4.49891500  | 0.03690200  |
| H | 4.71036500 | 2.89963400  | -0.54317200 |
| H | 1.83200900 | 5.87571700  | 0.59733600  |
| H | 4.17822500 | 5.24209500  | 0.08790900  |
| C | 4.49490300 | -2.96919100 | -0.94903100 |
| C | 4.41973100 | -2.92695500 | 0.44420700  |
| C | 3.47718300 | -2.11965000 | 1.06818700  |
| C | 2.59513800 | -1.34618600 | 0.30534000  |
| C | 2.67381800 | -1.39232700 | -1.08557500 |
| C | 3.62142200 | -2.19916800 | -1.71204300 |
| H | 5.23228600 | -3.59964200 | -1.43550500 |
| H | 5.09783300 | -3.52655200 | 1.04319100  |
| H | 3.40132600 | -2.07263400 | 2.14992400  |
| H | 1.99161400 | -0.78763200 | -1.67853000 |
| H | 3.67641600 | -2.22521100 | -2.79561200 |
| C | 1.60745100 | -0.50611900 | 1.03116900  |
| N | 1.33093800 | -0.24934600 | 2.17671400  |

**P**

01

|   |             |             |             |
|---|-------------|-------------|-------------|
| C | -2.17187900 | -0.00001300 | 0.00000800  |
| C | -1.47927300 | 1.20967800  | -0.00002900 |
| C | -0.08965800 | 1.21713200  | 0.00003000  |
| C | 0.60073200  | 0.00002400  | 0.00000600  |
| C | -0.08966900 | -1.21711300 | -0.00001900 |
| C | -1.47928200 | -1.20969700 | 0.00001700  |
| H | -3.25678800 | 0.00004500  | -0.00000700 |
| H | -2.02199600 | 2.14849200  | -0.00004700 |
| H | 0.46239700  | 2.15045400  | 0.00002300  |
| H | 0.46245500  | -2.15038700 | -0.00002200 |
| H | -2.02192200 | -2.14856400 | 0.00000800  |
| C | 2.04047100  | -0.00000200 | 0.00000000  |
| N | 3.19817200  | -0.00001300 | -0.00000500 |

## 5 Characterization of products

### 5.1 Spectral data

#### Benzonitrile (2a)<sup>4a</sup>

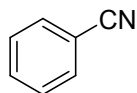

**Aspect:** colorless oil (41.8 mg, 81% yield).

**<sup>1</sup>H NMR** (400 MHz, CDCl<sub>3</sub>)  $\delta$  7.67 – 7.65 (m, 2H), 7.63 – 7.59 (m, 1H), 7.50 – 7.46 (m, 2H).

**<sup>13</sup>C NMR** (100 MHz, CDCl<sub>3</sub>)  $\delta$  132.8, 132.2, 129.1, 118.9, 112.5.

#### 4-Methylbenzonitrile (2b)<sup>4b</sup>

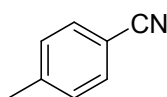

**Aspect:** colorless oil (43.9 mg, 75% yield).

**<sup>1</sup>H NMR** (400 MHz, CDCl<sub>3</sub>)  $\delta$  7.54 (d, *J* = 8.2 Hz, 2H), 7.27 (d, *J* = 8.0 Hz, 2H), 2.42 (s, 3H).

**<sup>13</sup>C NMR** (100 MHz, CDCl<sub>3</sub>)  $\delta$  143.7, 132.1, 129.9, 119.2, 109.3, 21.8.

#### 3-Methylbenzonitrile (2c)<sup>4e</sup>

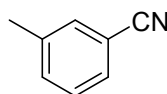

**Aspect:** colorless oil (48.6 mg, 83% yield).

**<sup>1</sup>H NMR** (400 MHz, CDCl<sub>3</sub>)  $\delta$  7.47 – 7.43 (m, 2H), 7.40 (d, *J* = 8.1 Hz, 1H), 7.37 – 7.33 (m, 1H), 2.39 (s, 3H).

**<sup>13</sup>C NMR** (100 MHz, CDCl<sub>3</sub>)  $\delta$  139.2, 133.6, 132.5, 129.3, 129.0, 119.1, 112.3, 21.2.

#### 3,4-Dimethylbenzonitrile (2d)<sup>4g</sup>

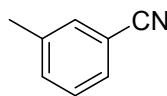

**Aspect:** white solid (51.8 mg, 79% yield).

**MP:** 63 – 64 °C.

**<sup>1</sup>H NMR** (400 MHz, CDCl<sub>3</sub>)  $\delta$  7.42 – 7.37 (m, 2H), 7.21 (d, *J* = 7.7 Hz, 1H), 2.32 (s, 3H), 2.29 (s, 3H).

**<sup>13</sup>C NMR** (100 MHz, CDCl<sub>3</sub>)  $\delta$  142.5, 137.9, 132.9, 130.3, 129.7, 119.3, 109.5, 20.2, 19.6.

#### 4-Methoxybenzonitrile (2e)<sup>4a</sup>

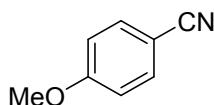

**Aspect:** white solid (47.9 mg, 72% yield).

**MP:** 59 – 61 °C.

**<sup>1</sup>H NMR** (400 MHz, CDCl<sub>3</sub>) δ 7.62 – 7.57 (m, 2H), 6.98 – 6.93 (m, 2H), 3.86 (s, 3H).

**<sup>13</sup>C NMR** (100 MHz, CDCl<sub>3</sub>) δ 162.8, 134.0, 119.2, 114.8, 104.0, 55.6.

### 3-Methoxybenzonitrile (2f)<sup>4b</sup>

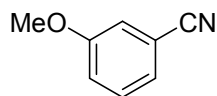

**Aspect:** colorless oil (52.6 mg, 79% yield).

**<sup>1</sup>H NMR** (400 MHz, CDCl<sub>3</sub>) δ 7.40 – 7.35 (m, 1H), 7.27 – 7.23 (m, 1H), 7.15 – 7.12 (m, 2H), 3.84 (s, 3H).

**<sup>13</sup>C NMR** (100 MHz, CDCl<sub>3</sub>) δ 159.6, 130.3, 124.5, 119.3, 118.8, 116.8, 113.2, 55.5.

### 3,4,5-Trimethoxybenzonitrile (2g)<sup>4c</sup>

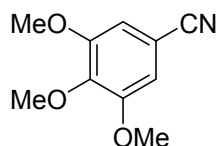

**Aspect:** white solid (83.1 mg, 86% yield).

**MP:** 92 – 93 °C.

**<sup>1</sup>H NMR** (400 MHz, CDCl<sub>3</sub>) δ 6.87 (s, 2H), 3.91 (s, 3H), 3.88 (s, 6H).

**<sup>13</sup>C NMR** (100 MHz, CDCl<sub>3</sub>) δ 153.5, 142.3, 119.0, 109.4, 106.7, 61.0, 56.4.

### 4-Ethoxybenzonitrile (2h)<sup>4h</sup>

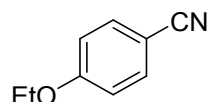

**Aspect:** white solid (54.5 mg, 74% yield).

**MP:** 61 – 63 °C.

**<sup>1</sup>H NMR** (400 MHz, CDCl<sub>3</sub>) δ 7.60 – 7.55 (m, 2H), 6.96 – 6.91 (m, 2H), 4.08 (q, *J* = 7.0 Hz, 2H), 1.44 (t, *J* = 7.0 Hz, 3H).

**<sup>13</sup>C NMR** (100 MHz, CDCl<sub>3</sub>) δ 162.3, 134.0, 119.3, 115.1, 103.7, 63.9, 14.6.

### 4-Phenoxybenzonitrile (2i)<sup>4i</sup>

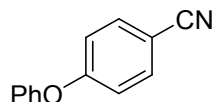

**Aspect:** white solid (83.9 mg, 86% yield).

**MP:** 43 – 45 °C.

**<sup>1</sup>H NMR** (400 MHz, CDCl<sub>3</sub>) δ 7.63 – 7.57 (m, 2H), 7.45 – 7.38 (m, 1H), 7.26 – 7.21 (m, 1H), 7.09 – 7.04 (m, 2H), 7.02 – 6.98 (m, 2H).

**<sup>13</sup>C NMR** (100 MHz, CDCl<sub>3</sub>) δ 161.7, 154.8, 134.1, 130.2, 125.2, 120.4, 118.9, 117.9, 105.8.

### [1,1'-Biphenyl]-4-carbonitrile (2j)<sup>4c</sup>



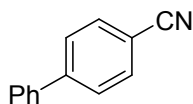

**Aspect:** white solid (68.1 mg, 76% yield).

**MP:** 86 – 87 °C.

**<sup>1</sup>H NMR** (400 MHz, CDCl<sub>3</sub>) δ 7.74 – 7.68 (m, 4H), 7.61 – 7.58 (m, 2H), 7.51 – 7.47 (m, 2H), 7.45 – 7.41 (m, 1H).

**<sup>13</sup>C NMR** (100 MHz, CDCl<sub>3</sub>) δ 145.7, 139.2, 132.6, 129.1, 128.7, 127.7, 127.2, 119.0, 110.9.

#### 4-Fluorobenzonitrile (2k)<sup>4b</sup>

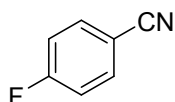

**Aspect:** white solid (44.8 mg, 74% yield).

**MP:** 34 – 35 °C.

**<sup>1</sup>H NMR** (400 MHz, CDCl<sub>3</sub>) δ 7.72 – 7.66 (m, 2H), 7.21 – 7.15 (m, 2H).

**<sup>13</sup>C NMR** (100 MHz, CDCl<sub>3</sub>) δ 165.1 (d, *J* = 256.5 Hz), 134.7 (d, *J* = 9.3 Hz), 118.1, 116.9 (d, *J* = 22.7 Hz), 108.6 (d, *J* = 3.6 Hz).

#### 4-Chlorobenzonitrile (2l)<sup>4b</sup>

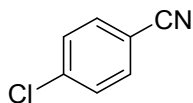

**Aspect:** white solid (47.5 mg, 69% yield).

**MP:** 93 – 95 °C.

**<sup>1</sup>H NMR** (400 MHz, CDCl<sub>3</sub>) δ 7.63 – 7.59 (m, 2H), 7.49 – 7.45 (m, 2H).

**<sup>13</sup>C NMR** (100 MHz, CDCl<sub>3</sub>) δ 139.6, 133.4, 129.7, 118.0, 110.8.

#### 3-Chlorobenzonitrile (2m)<sup>4f</sup>

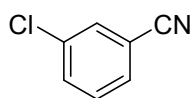

**Aspect:** white solid (53.0 mg, 77% yield).

**MP:** 39 – 41 °C.

**<sup>1</sup>H NMR** (400 MHz, CDCl<sub>3</sub>) δ 7.65 (t, *J* = 1.7 Hz, 1H), 7.63 – 7.52 (m, 2H), 7.43 (t, *J* = 7.9 Hz, 1H).

**<sup>13</sup>C NMR** (100 MHz, CDCl<sub>3</sub>) δ 135.3, 133.3, 132.0, 130.5, 130.3, 117.5, 114.0.

#### 2,6-Dichlorobenzonitrile (2n)<sup>4j</sup>

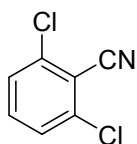

**Aspect:** white solid (67.1 mg, 78% yield).

**MP:** 144 – 145 °C.

**<sup>1</sup>H NMR** (400 MHz, CDCl<sub>3</sub>)  $\delta$  7.52 – 7.42 (m, 3H).

**<sup>13</sup>C NMR** (100 MHz, CDCl<sub>3</sub>)  $\delta$  138.5, 133.9, 128.2, 114.4, 113.4.

**4-Bromobenzonitrile (2o)**<sup>4f</sup>

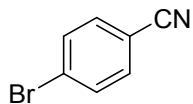

**Aspect:** white solid (69.2 mg, 76% yield).

**MP:** 111 – 112 °C.

**<sup>1</sup>H NMR** (400 MHz, CDCl<sub>3</sub>)  $\delta$  7.66 – 7.62 (m, 2H), 7.55 – 7.51 (m, 2H).

**<sup>13</sup>C NMR** (100 MHz, CDCl<sub>3</sub>)  $\delta$  133.4, 132.7, 128.0, 118.1, 111.3.

**3-Bromobenzonitrile (2p)**<sup>4f</sup>

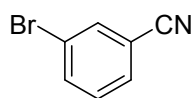

**Aspect:** white solid (75.5 mg, 83% yield).

**MP:** 38 – 39 °C.

**<sup>1</sup>H NMR** (400 MHz, CDCl<sub>3</sub>)  $\delta$  7.80 (t, *J* = 1.6 Hz, 1H), 7.75 (ddd, *J* = 8.1, 1.9, 1.0 Hz, 1H), 7.61 (dt, *J* = 7.8, 1.2 Hz, 1H), 7.37 (t, *J* = 7.9 Hz, 1H).

**<sup>13</sup>C NMR** (100 MHz, CDCl<sub>3</sub>)  $\delta$  136.1, 134.8, 130.7, 130.6, 122.9, 117.3, 114.2.

**2-Bromobenzonitrile (2q)**<sup>4a</sup>

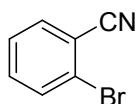

**Aspect:** white solid (71.9 mg, 79% yield).

**MP:** 53 – 55 °C.

**<sup>1</sup>H NMR** (400 MHz, CDCl<sub>3</sub>)  $\delta$  7.72 – 7.65 (m, 2H), 7.50 – 7.40 (m, 2H).

**<sup>13</sup>C NMR** (100 MHz, CDCl<sub>3</sub>)  $\delta$  134.4, 133.9, 133.2, 127.6, 125.4, 117.2, 115.9.

**4-Nitrobenzonitrile (2r)**<sup>4b</sup>

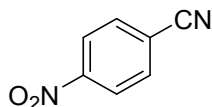

**Aspect:** yellow solid (65.2 mg, 88% yield).

**MP:** 143 – 145 °C.

**<sup>1</sup>H NMR** (400 MHz, CDCl<sub>3</sub>)  $\delta$  8.40 – 8.34 (m, 1H), 7.93 – 7.88 (m, 1H).

**<sup>13</sup>C NMR** (100 MHz, CDCl<sub>3</sub>)  $\delta$  150.0, 133.5, 124.3, 118.3, 116.8.

**3-Nitrobenzonitrile (2s)**<sup>4d</sup>

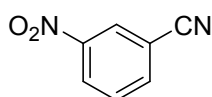

**Aspect:** white solid (64.4 mg, 87% yield).

**MP:** 112 – 114 °C.

**<sup>1</sup>H NMR** (400 MHz, CDCl<sub>3</sub>) δ 8.55 (t, 1H, *J* = 1.8 Hz), 8.49 (ddd, 1H, *J* = 8.3, 2.3, 1.0 Hz), 8.01 (dt, 1H, *J* = 7.8, 1.3 Hz), 7.75 (t, 1H, *J* = 8.3 Hz).

**<sup>13</sup>C NMR** (100 MHz, CDCl<sub>3</sub>) δ 148.3, 137.6, 130.7, 127.5, 127.3, 116.5, 114.2.

#### 2-Naphthonitrile (2t)<sup>4c</sup>

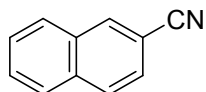

**Aspect:** white solid (62.0 mg, 81% yield).

**MP:** 36 – 38 °C.

**<sup>1</sup>H NMR** (400 MHz, CDCl<sub>3</sub>) δ 8.24 (s, 1H), 7.94 – 7.88 (m, 3H), 7.69 – 7.56 (m, 3H).

**<sup>13</sup>C NMR** (100 MHz, CDCl<sub>3</sub>) δ 134.7, 134.2, 132.3, 129.2, 129.1, 128.4, 128.1, 127.7, 126.4, 119.3, 109.4.

#### Thiophene-2-carbonitrile (2u)<sup>4a</sup>

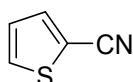

**Aspect:** colorless oil (37.7 mg, 69% yield).

**<sup>1</sup>H NMR** (400 MHz, CDCl<sub>3</sub>) δ 7.65 – 7.61 (m, 2H), 7.14 (dd, *J* = 5.0, 3.8 Hz, 1H).

**<sup>13</sup>C NMR** (100 MHz, CDCl<sub>3</sub>) δ 137.4, 132.6, 127.7, 114.2, 109.9.

#### Nicotinonitrile (2v)<sup>4b</sup>

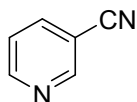

**Aspect:** white solid (40.1 mg, 77% yield).

**MP:** 50 – 51 °C.

**<sup>1</sup>H NMR** (400 MHz, CDCl<sub>3</sub>) δ 8.91 (d, *J* = 1.5 Hz, 1H), 8.84 (dd, *J* = 4.9, 1.6 Hz, 1H), 7.98 (dt, *J* = 8.0, 1.9 Hz, 1H), 7.46 (ddd, *J* = 8.0, 5.0, 0.9 Hz, 1H).

**<sup>13</sup>C NMR** (100 MHz, CDCl<sub>3</sub>) δ 153.0, 152.5, 139.3, 123.6, 116.5, 110.2.

#### Cinnamonitrile (2w)<sup>4a</sup>

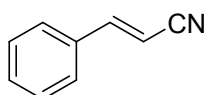

**Aspect:** colorless oil (15.5 mg, 24% yield).

**<sup>1</sup>H NMR** (400 MHz, CDCl<sub>3</sub>) δ 7.47 – 7.38 (m, 6H), 5.89 (d, *J* = 16.7 Hz, 1H).

**<sup>13</sup>C NMR** (100 MHz, CDCl<sub>3</sub>) δ 150.6, 133.5, 131.2, 129.1, 127.4, 118.2, 96.3.

## 5.2 Copies of the $^1\text{H}$ NMR and $^{13}\text{C}$ NMR Spectra

**2a**

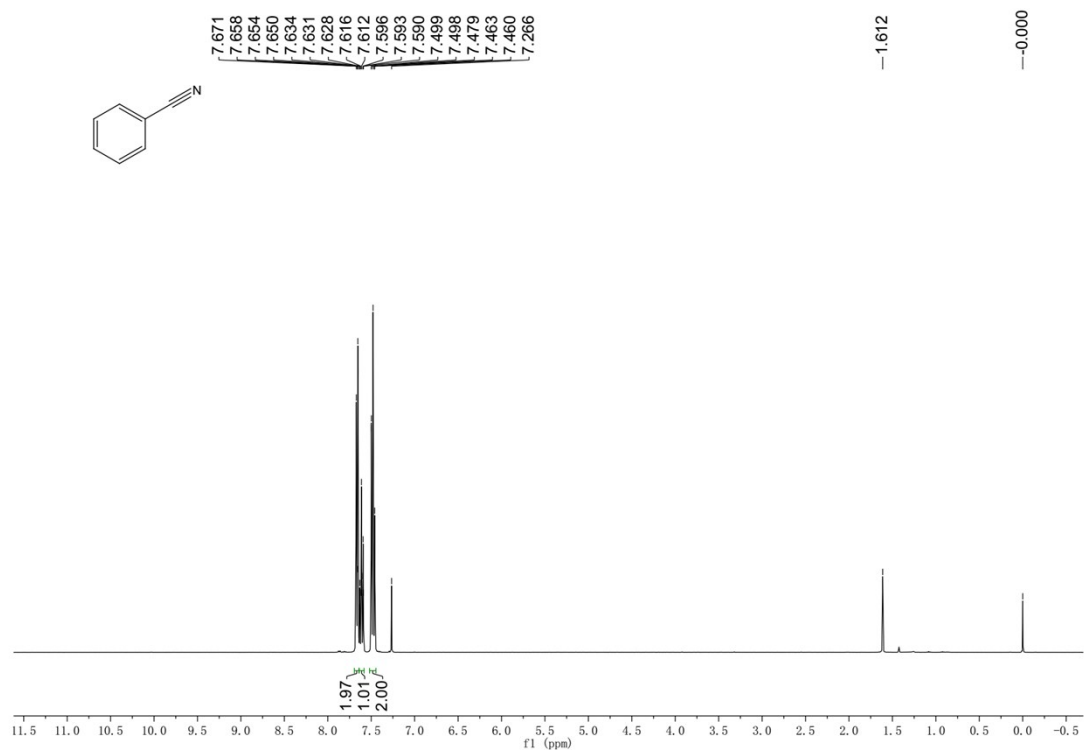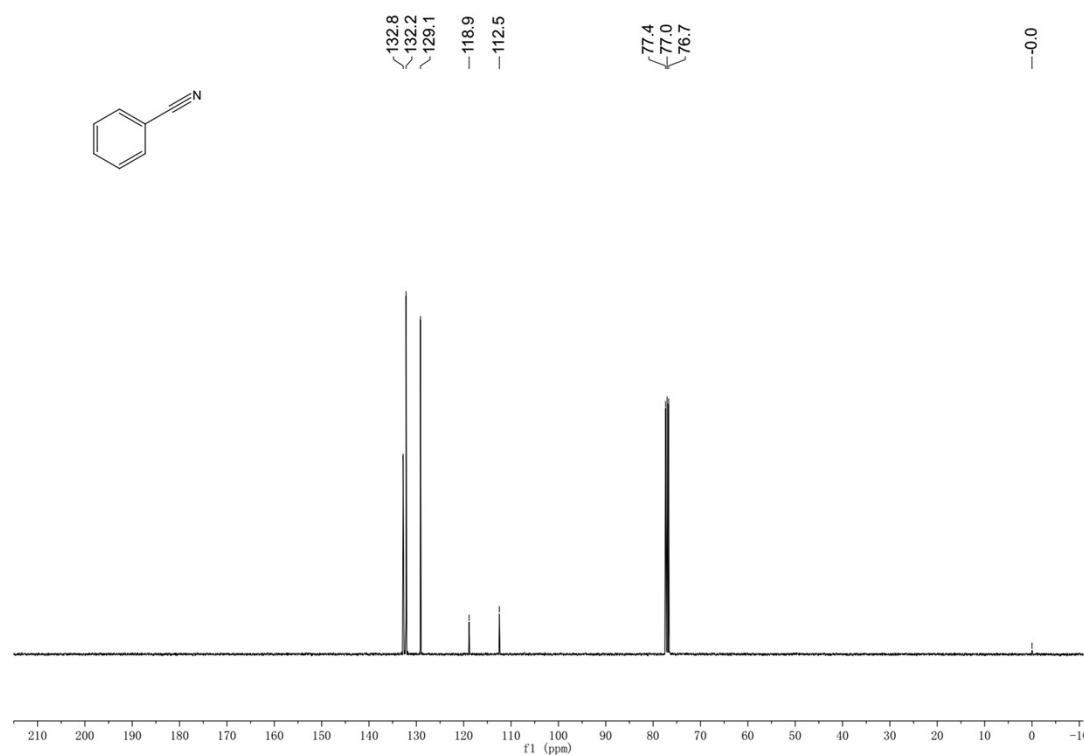

2b

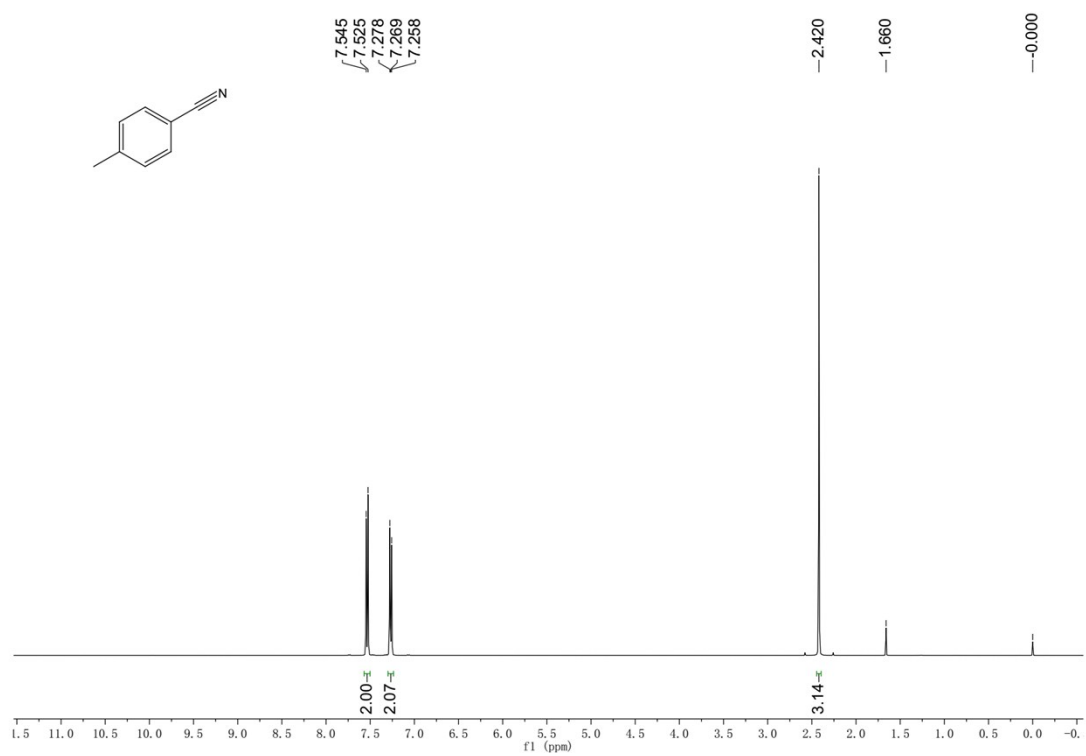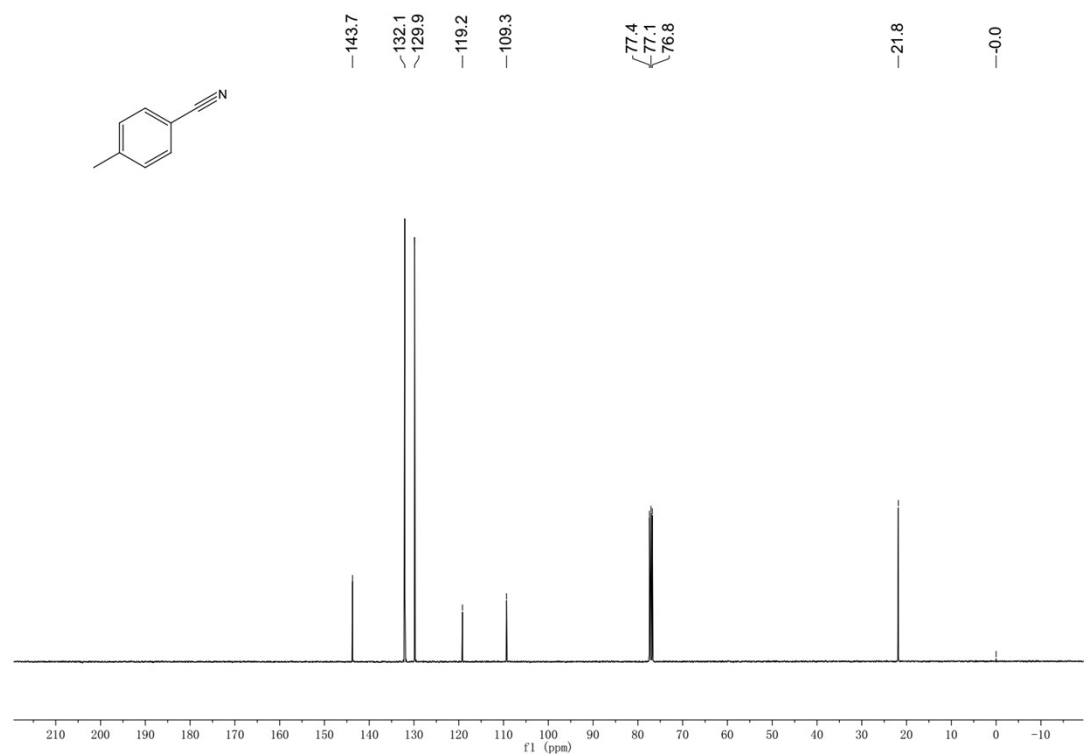

2c

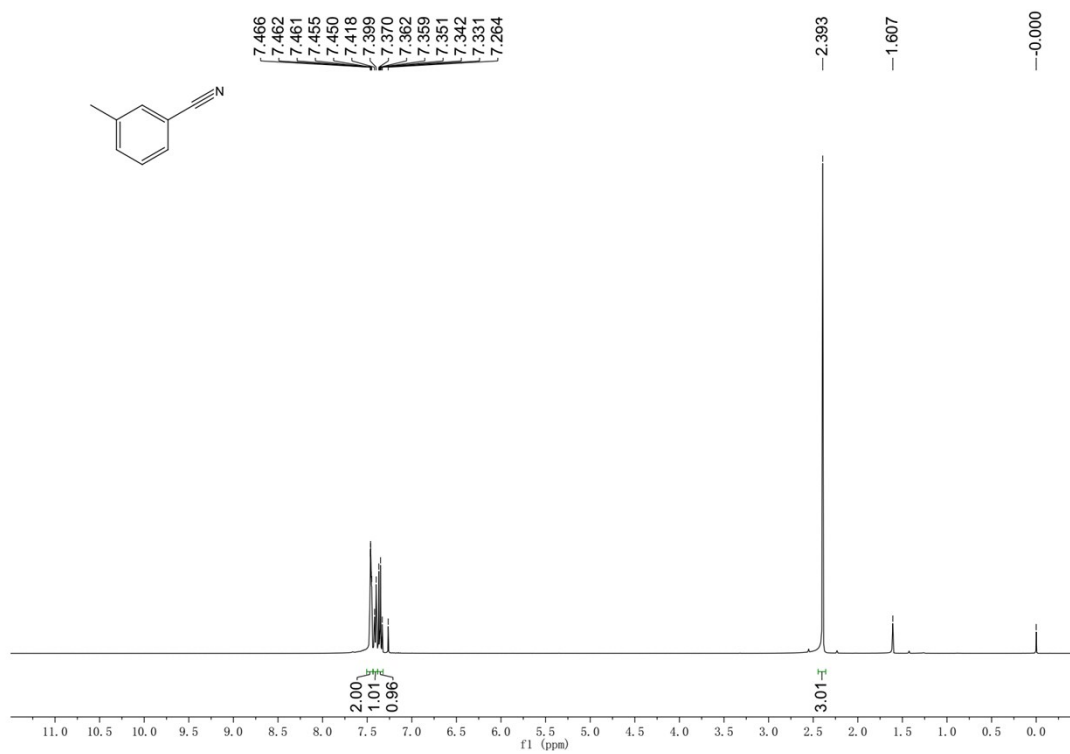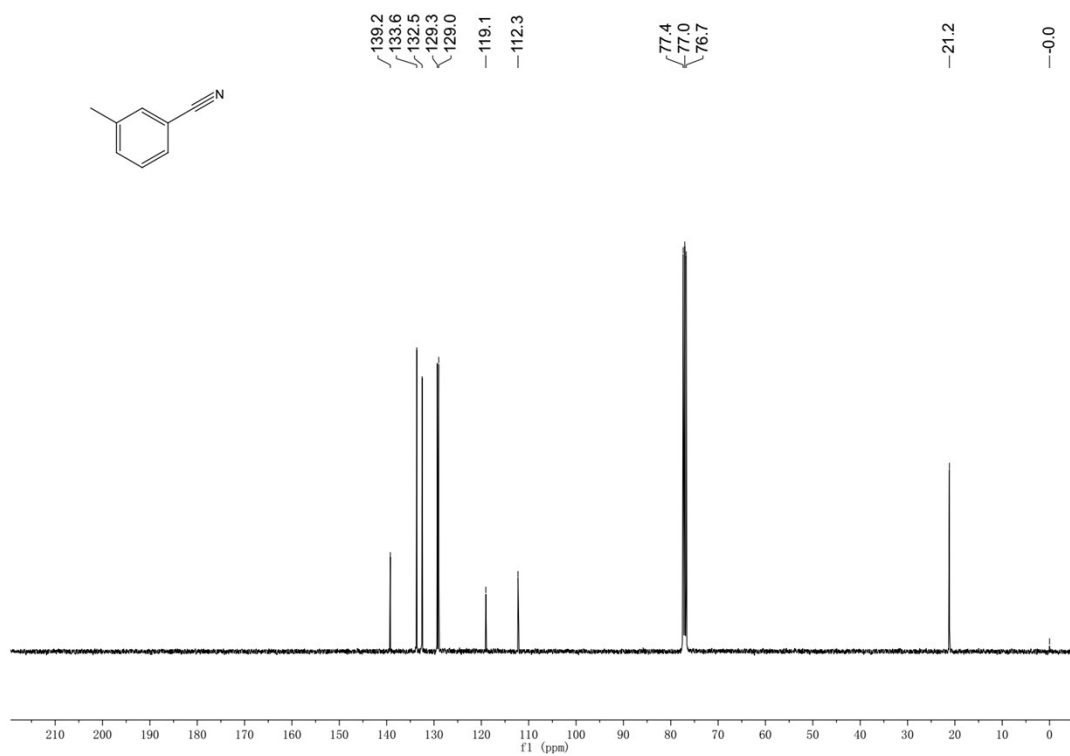

2d

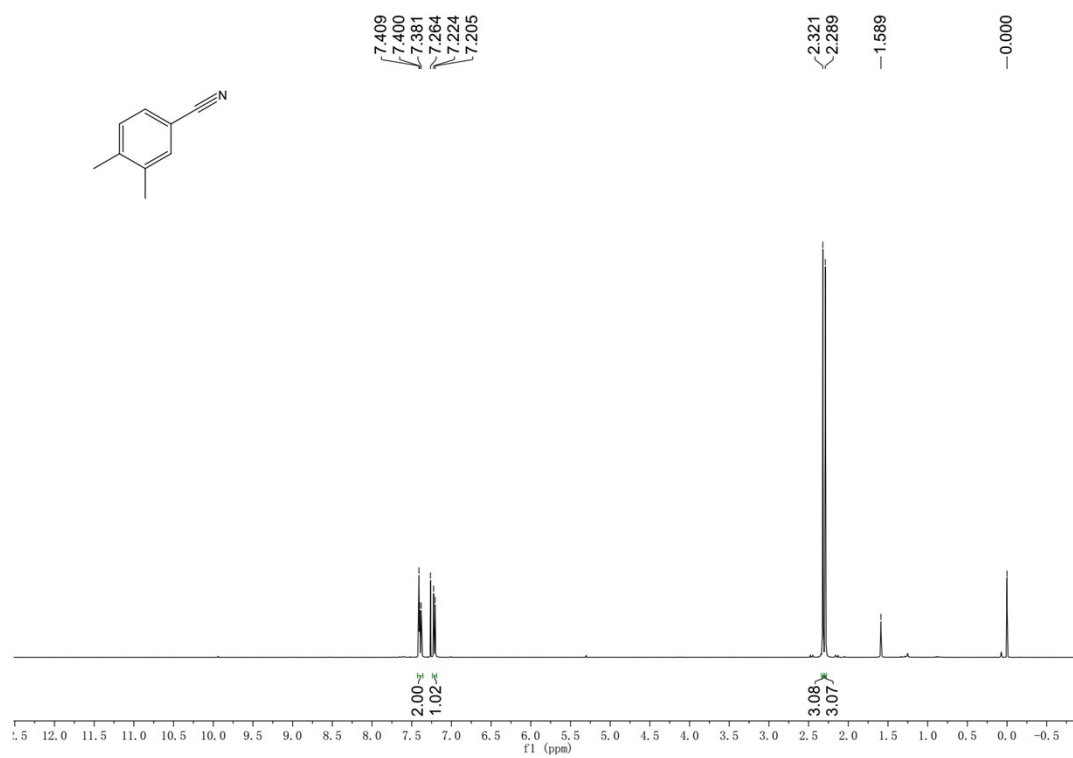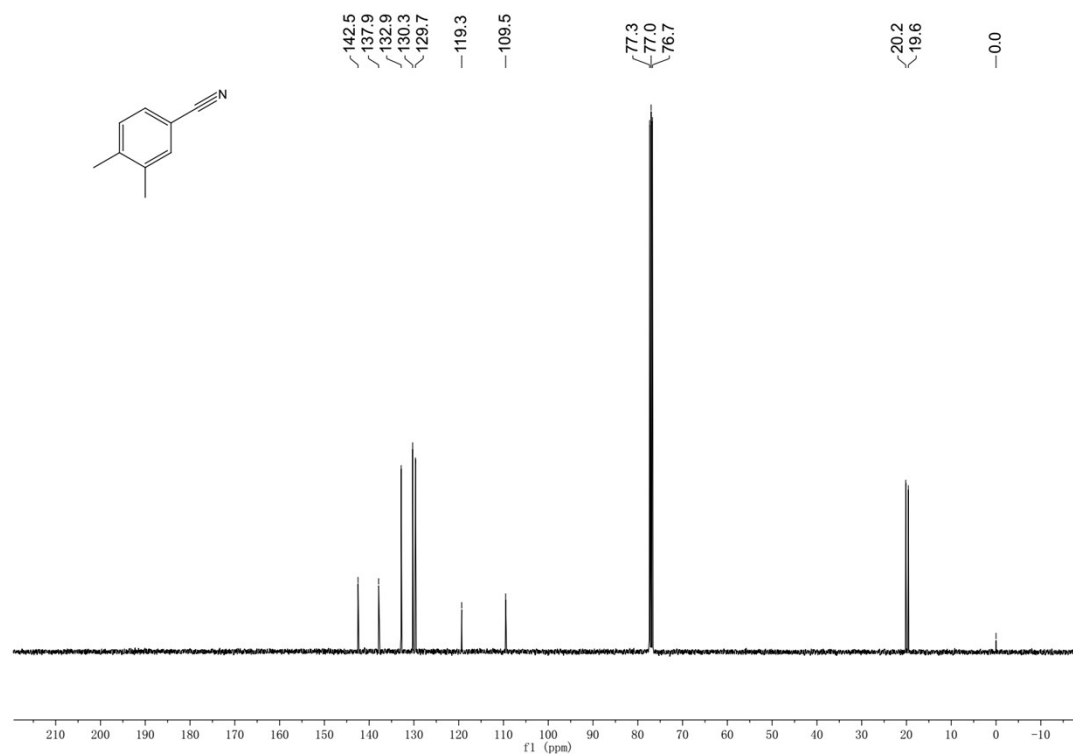

2e

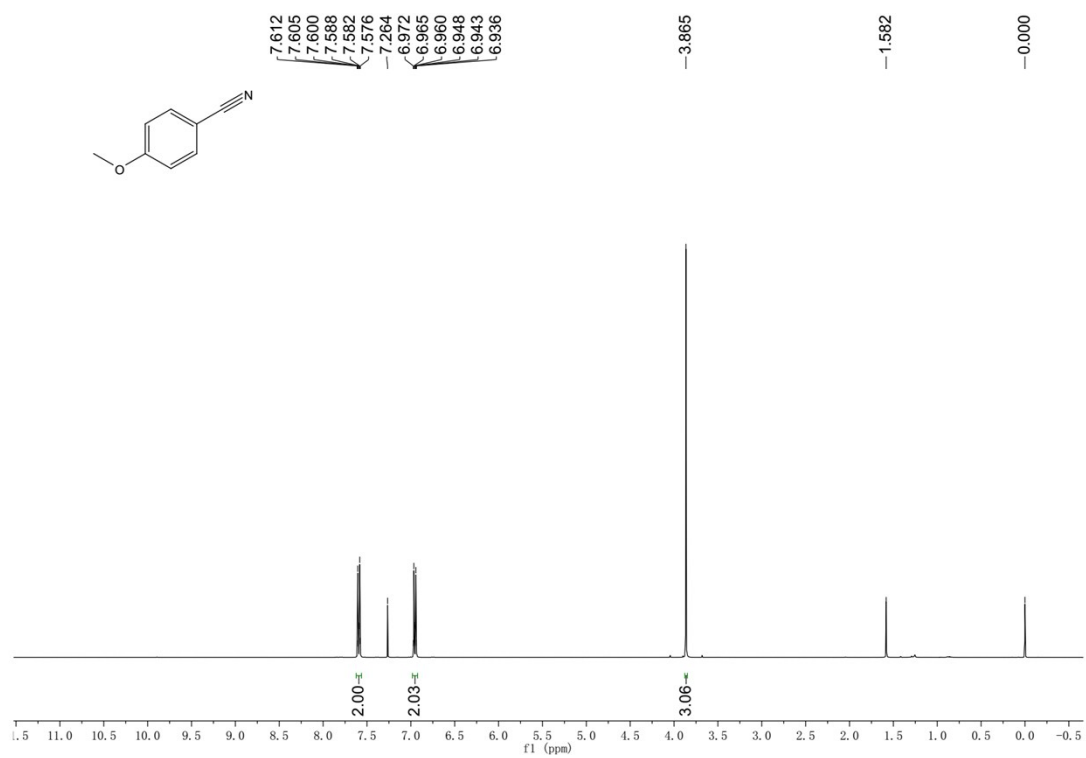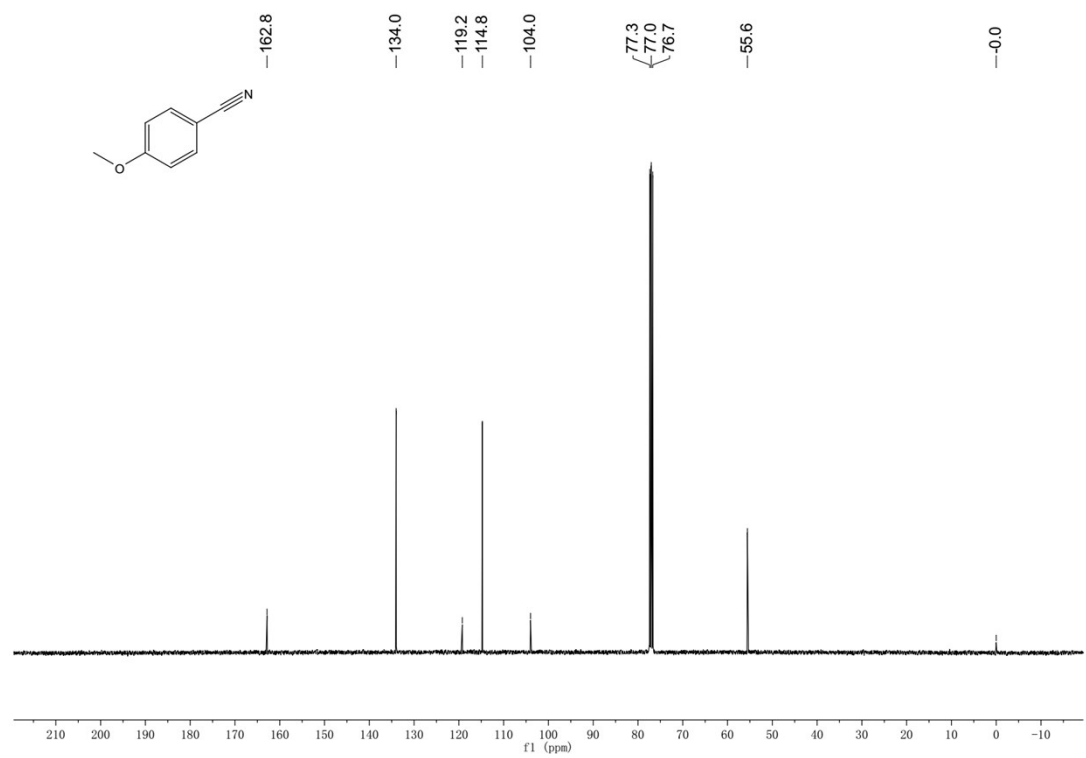



2f

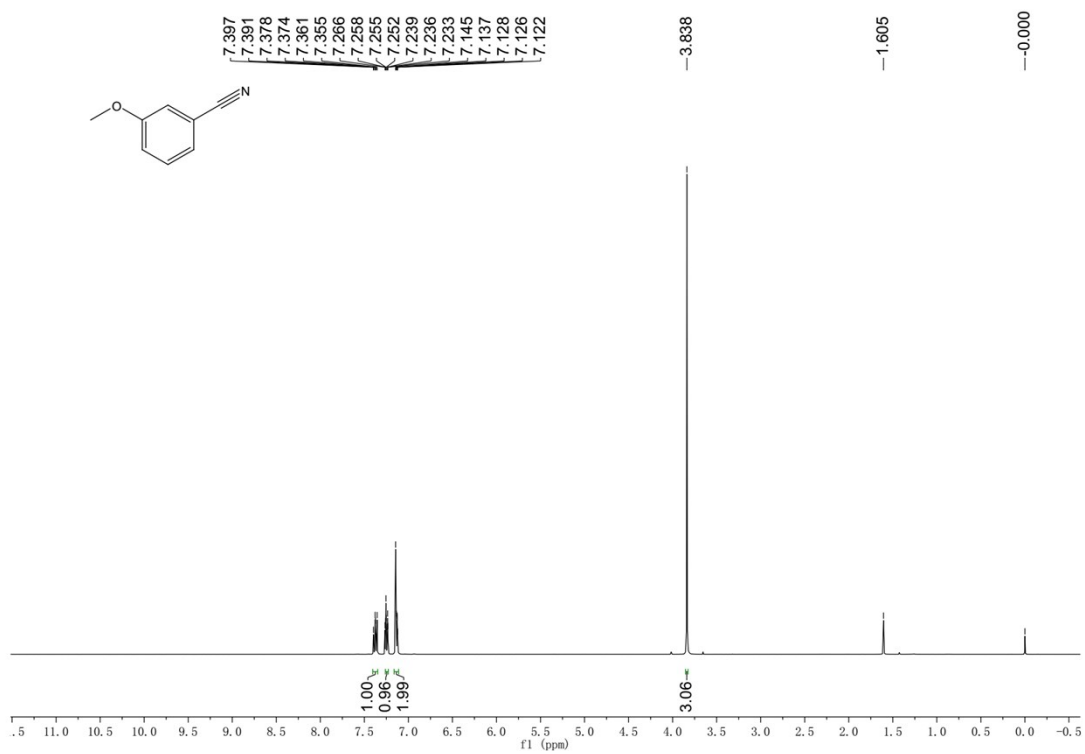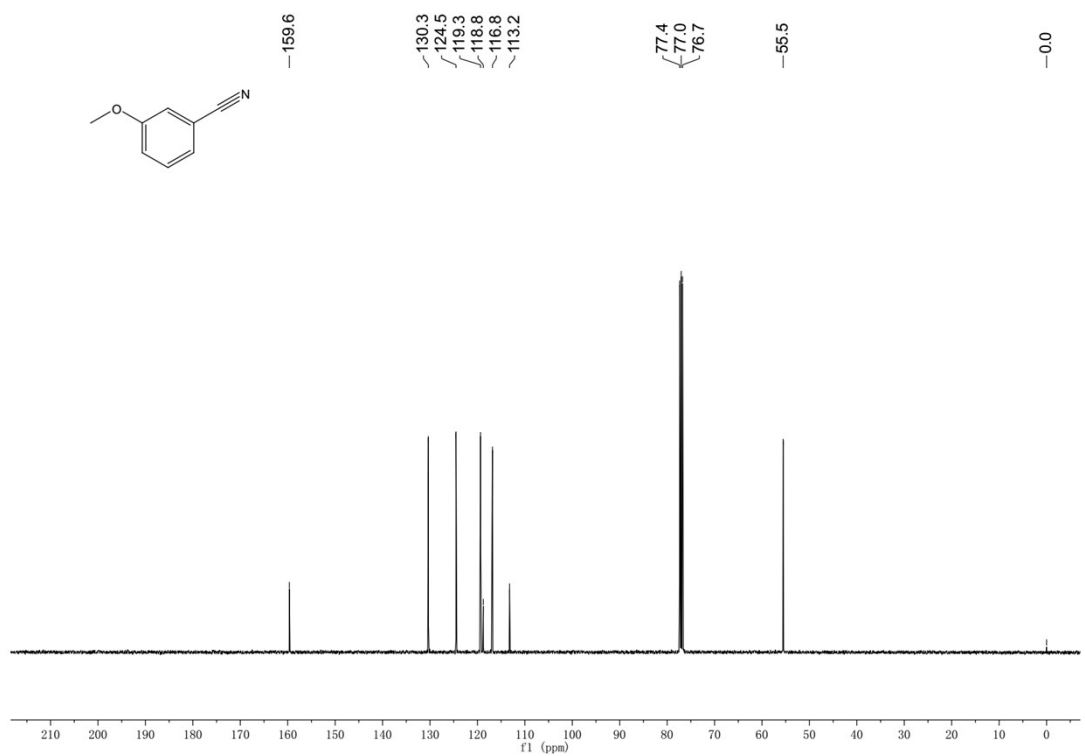

2g

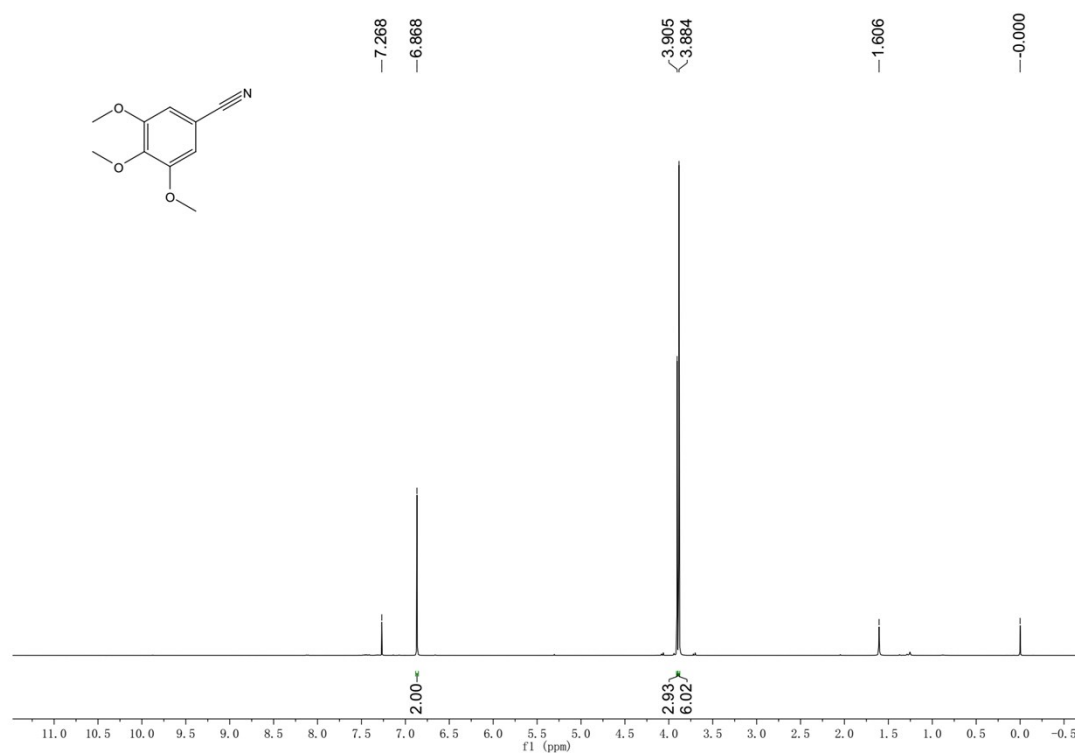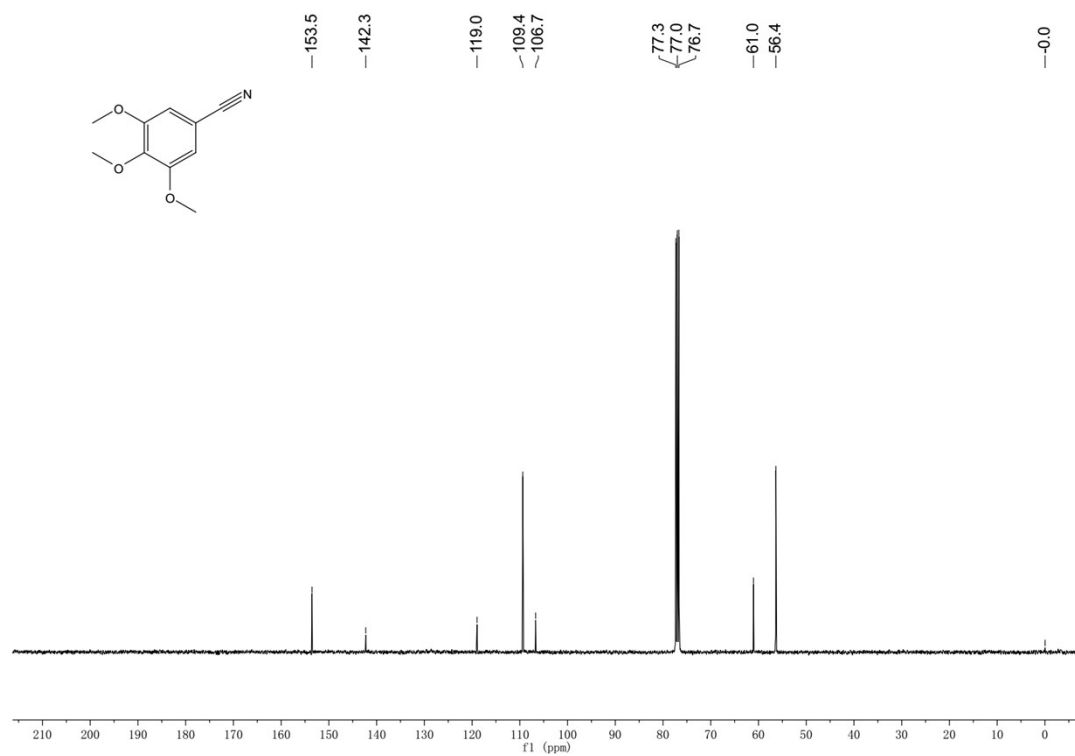

2h

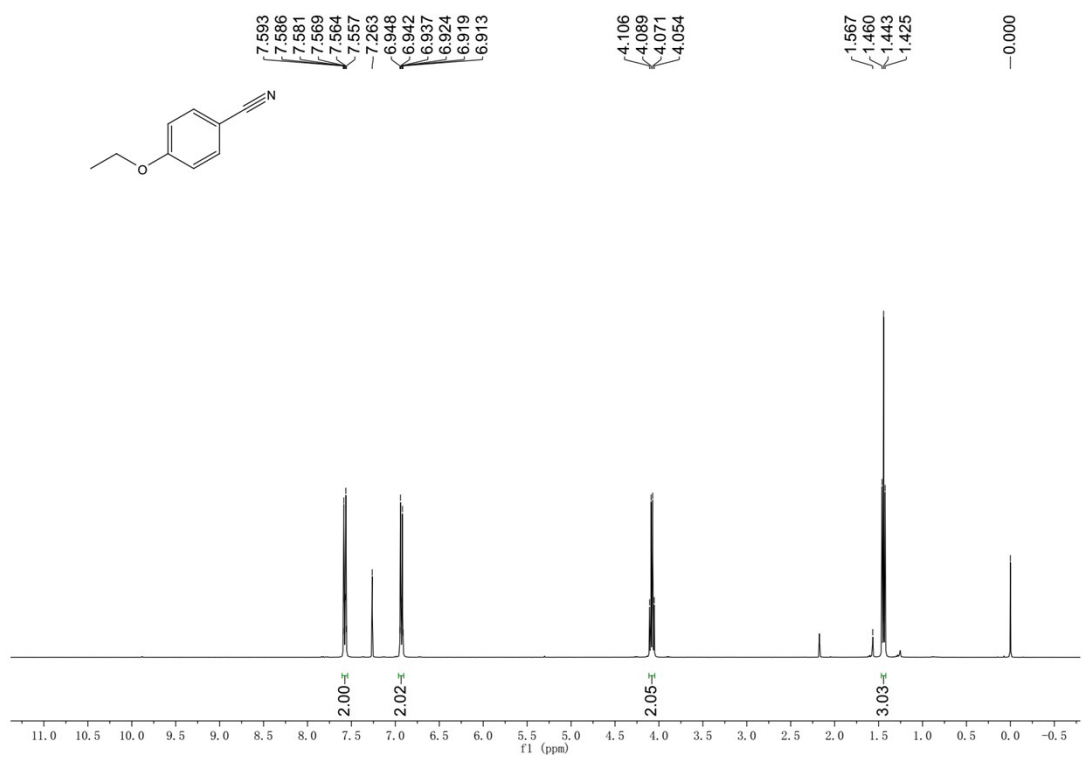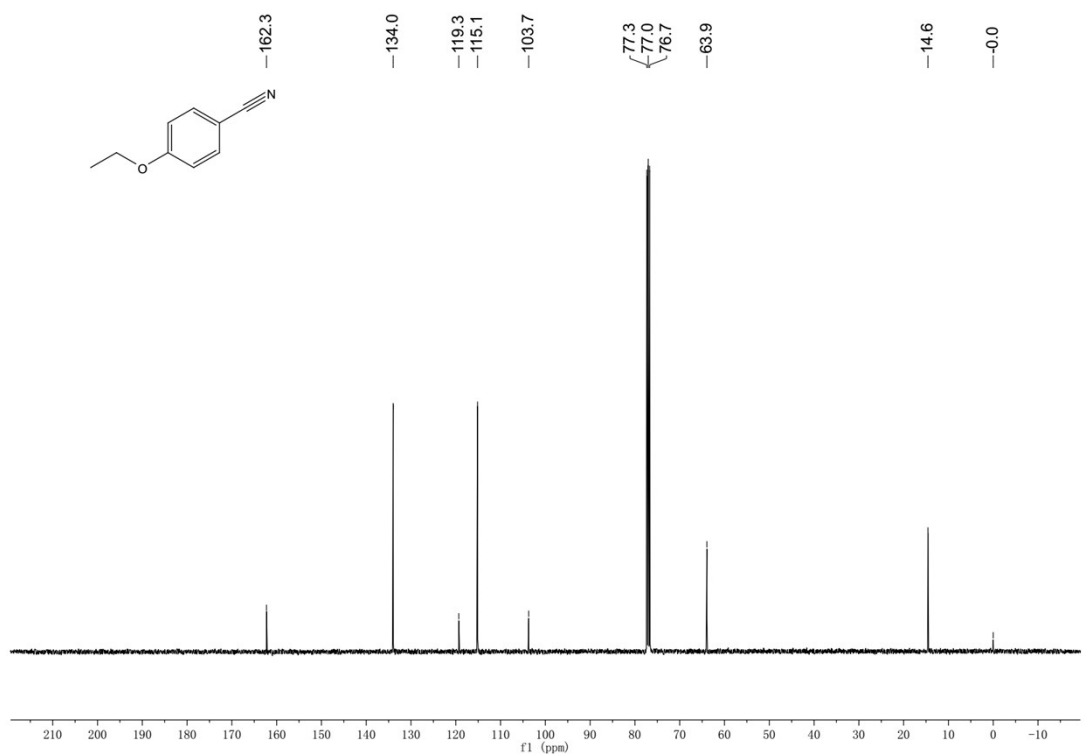

2i

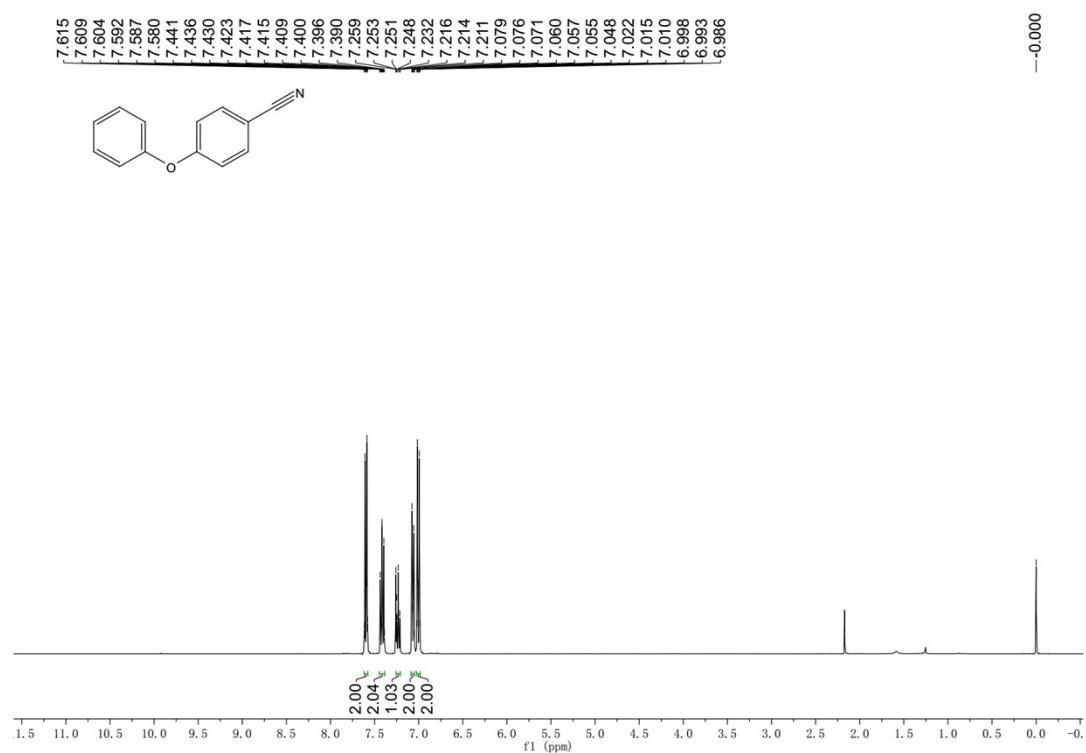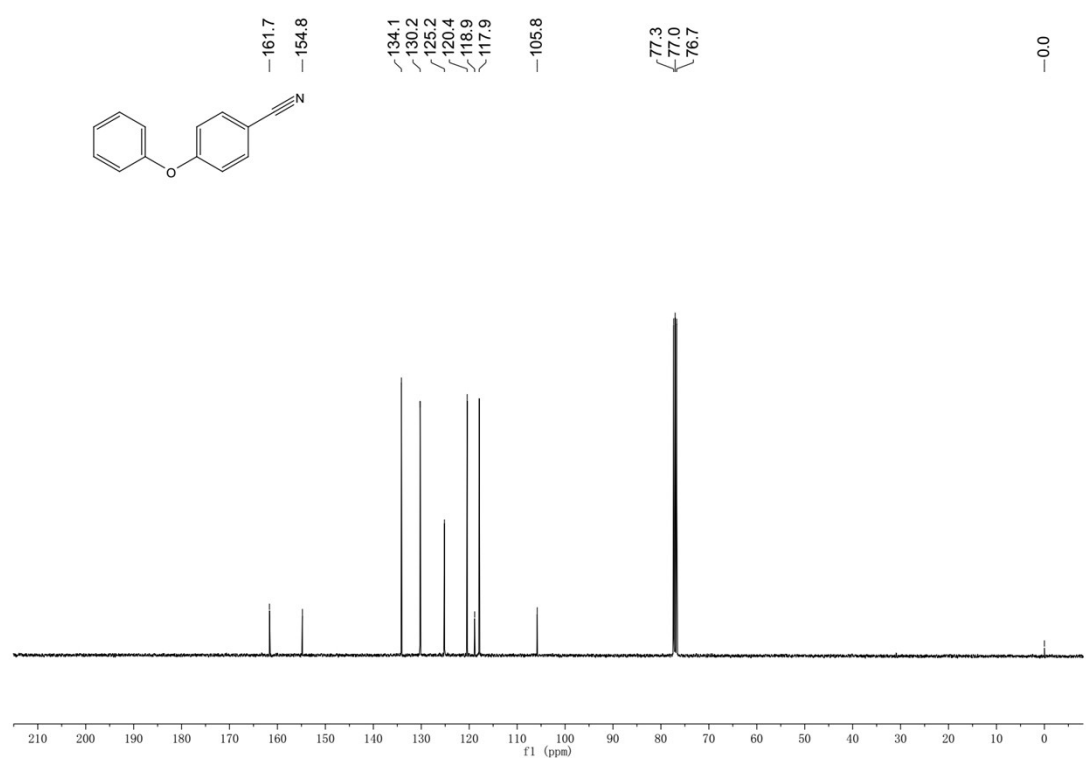

2j

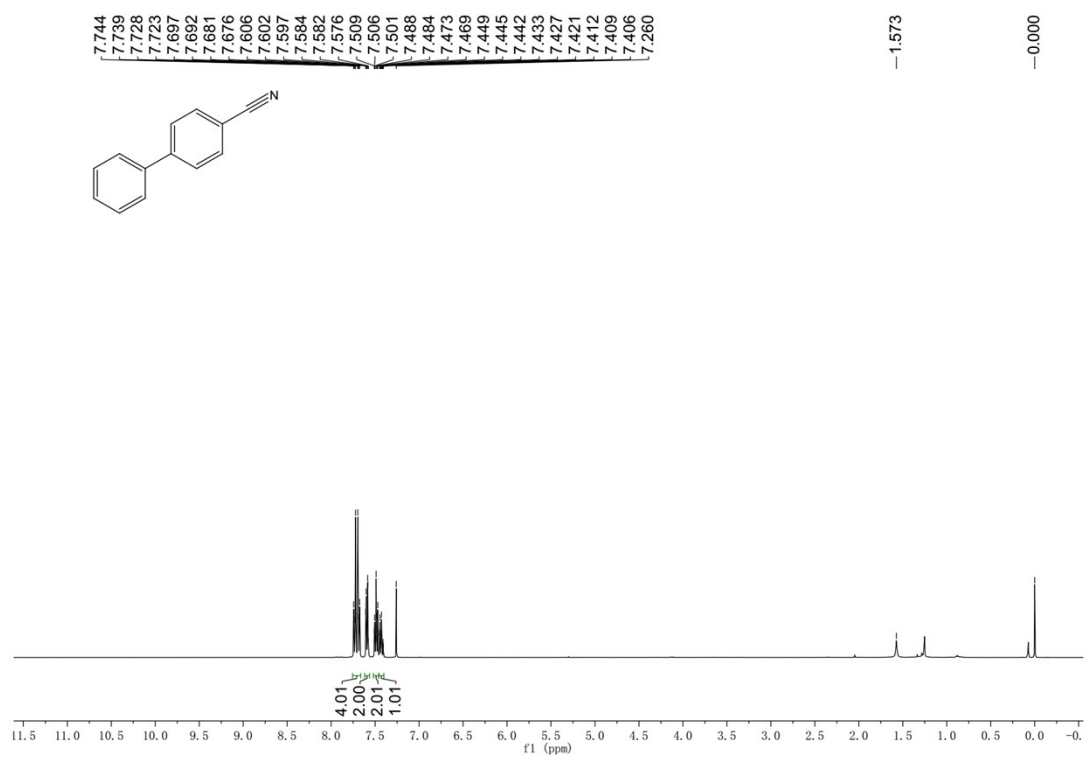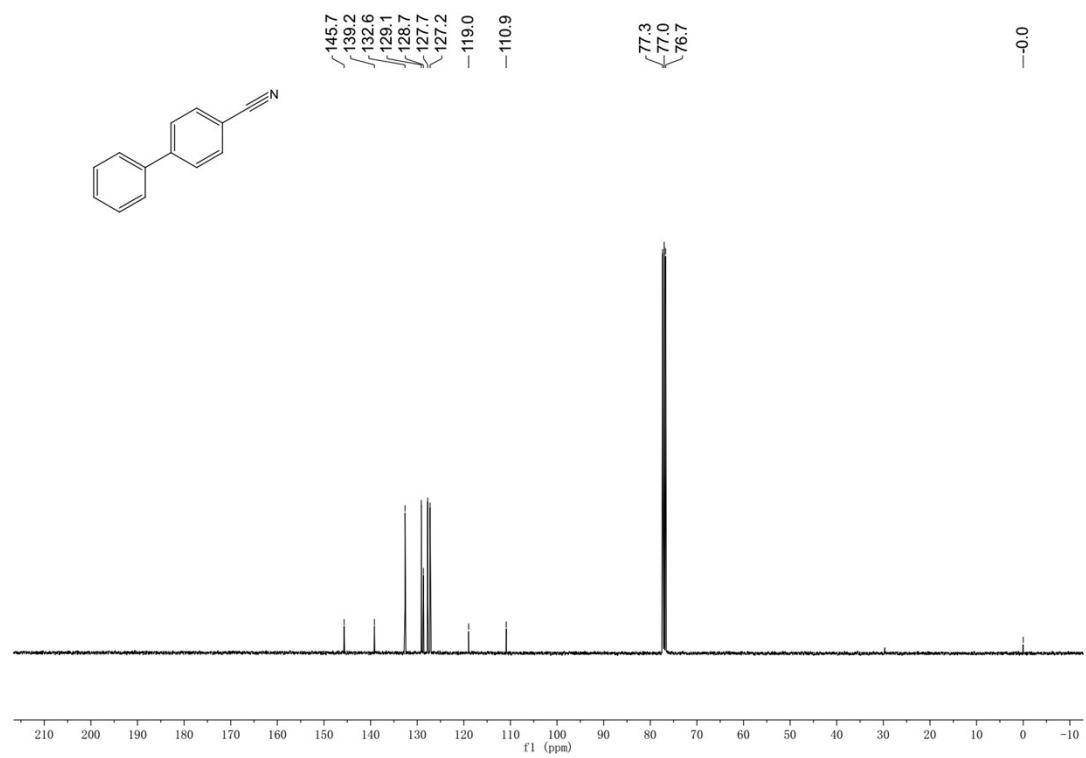

2k

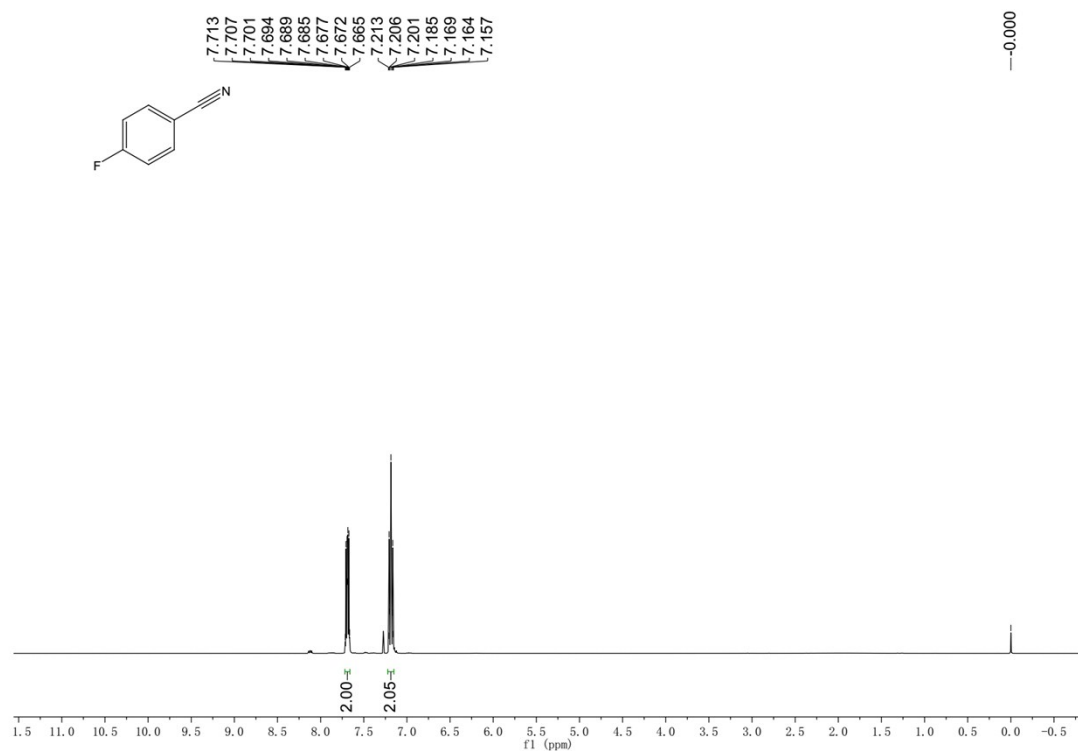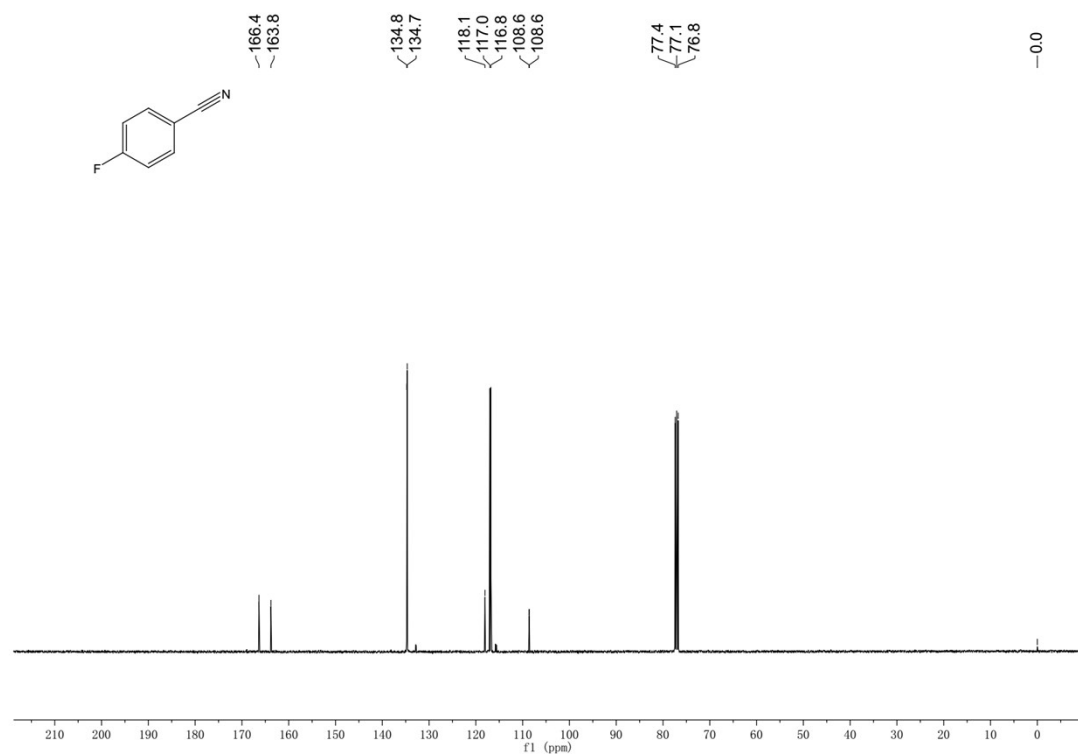

21

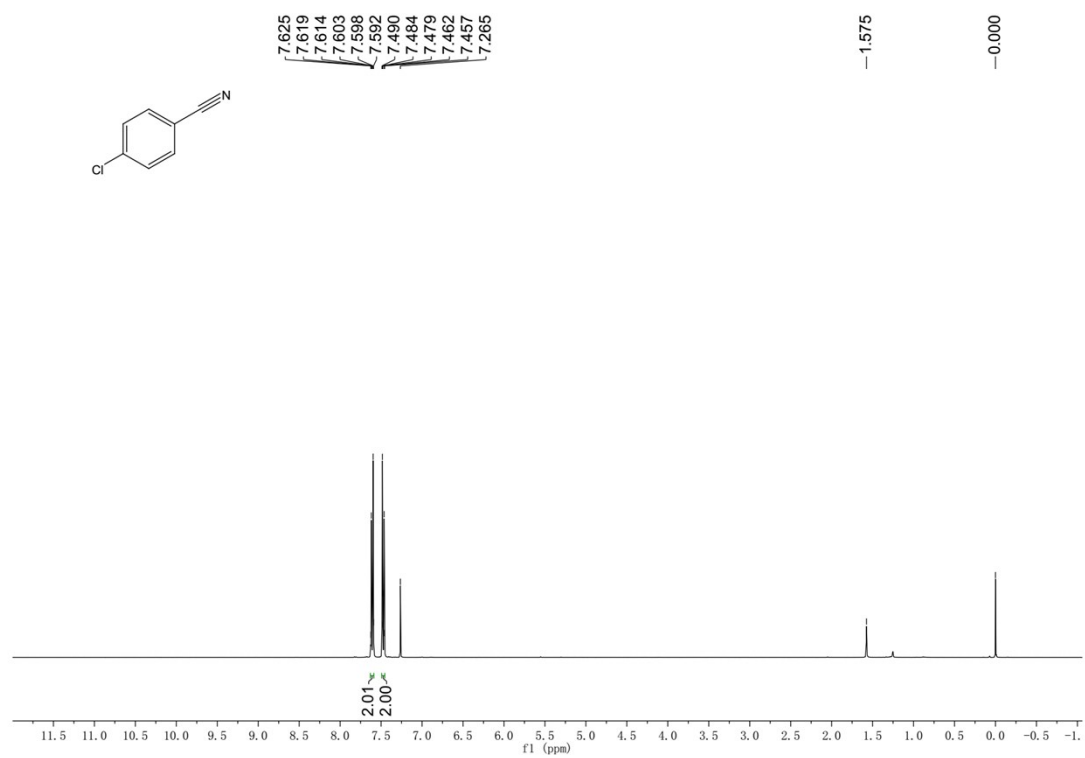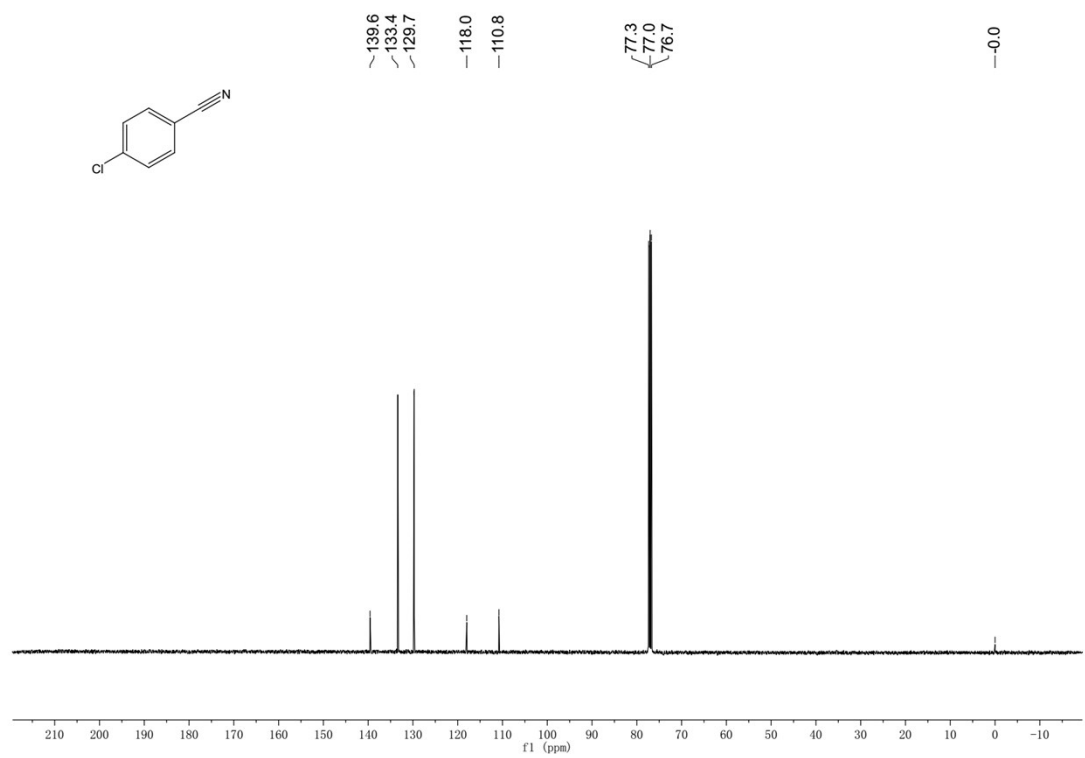

2m

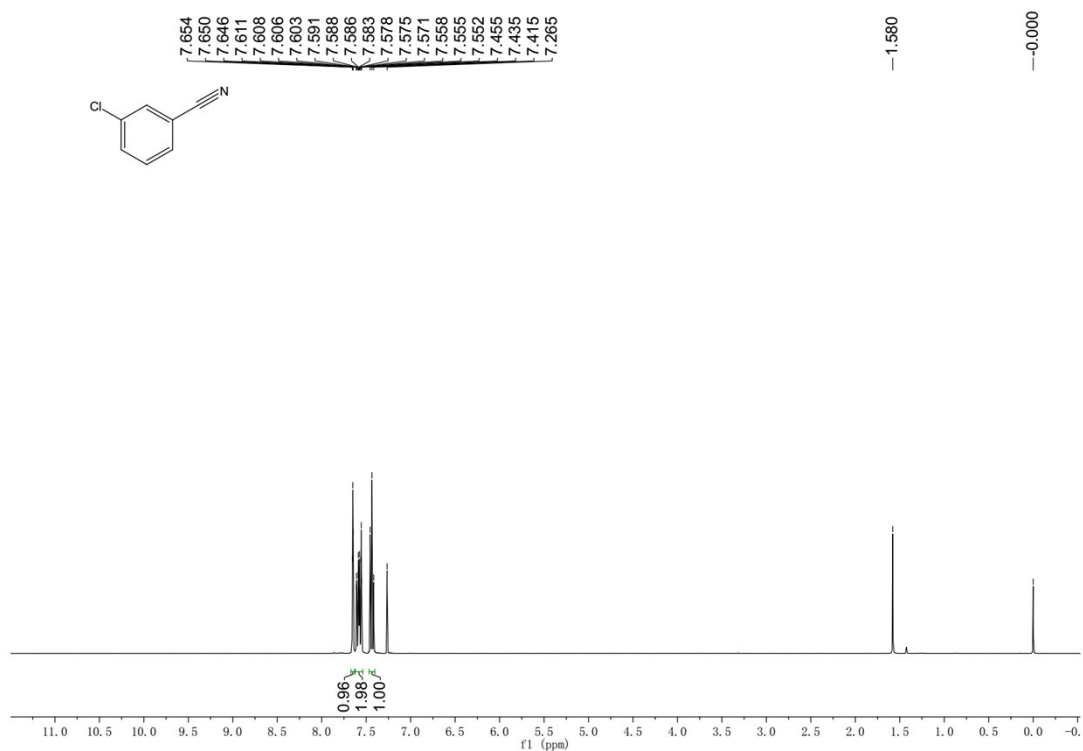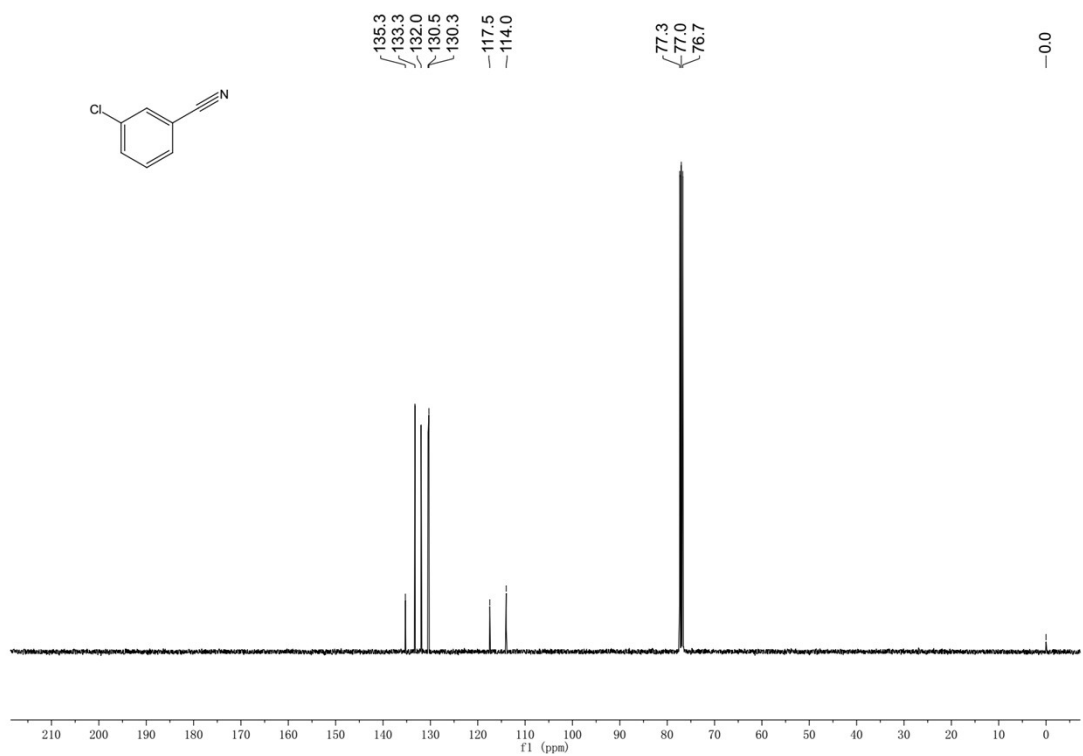



2n

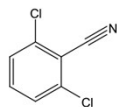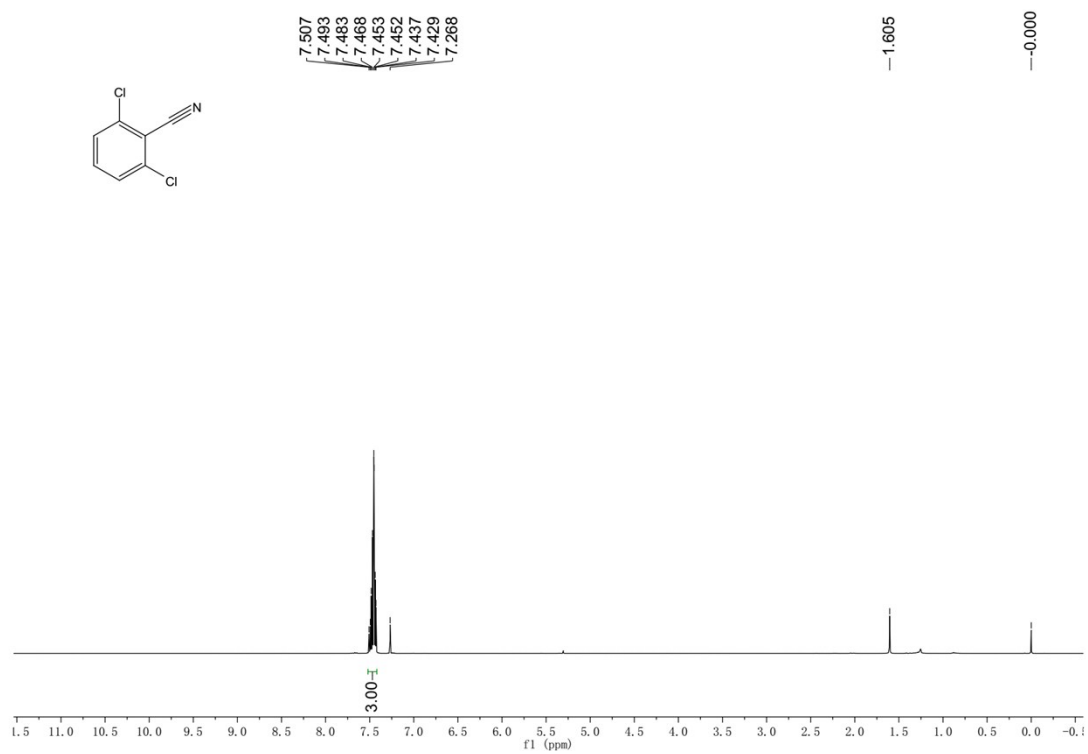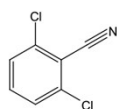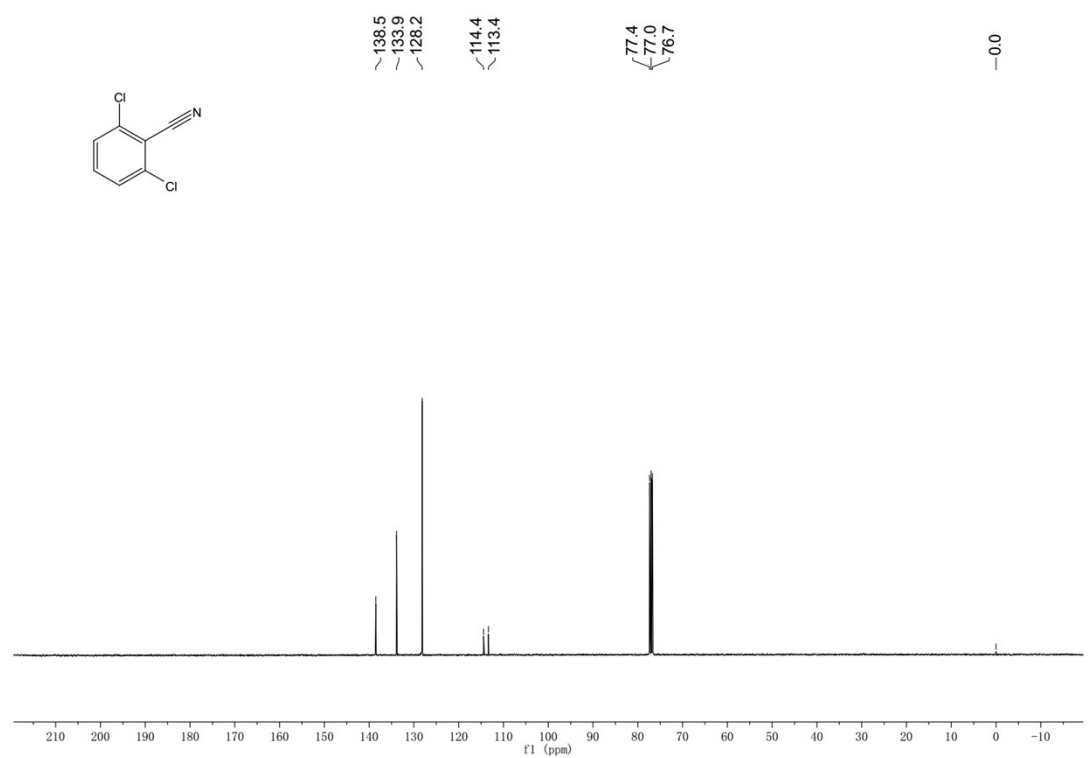

2o

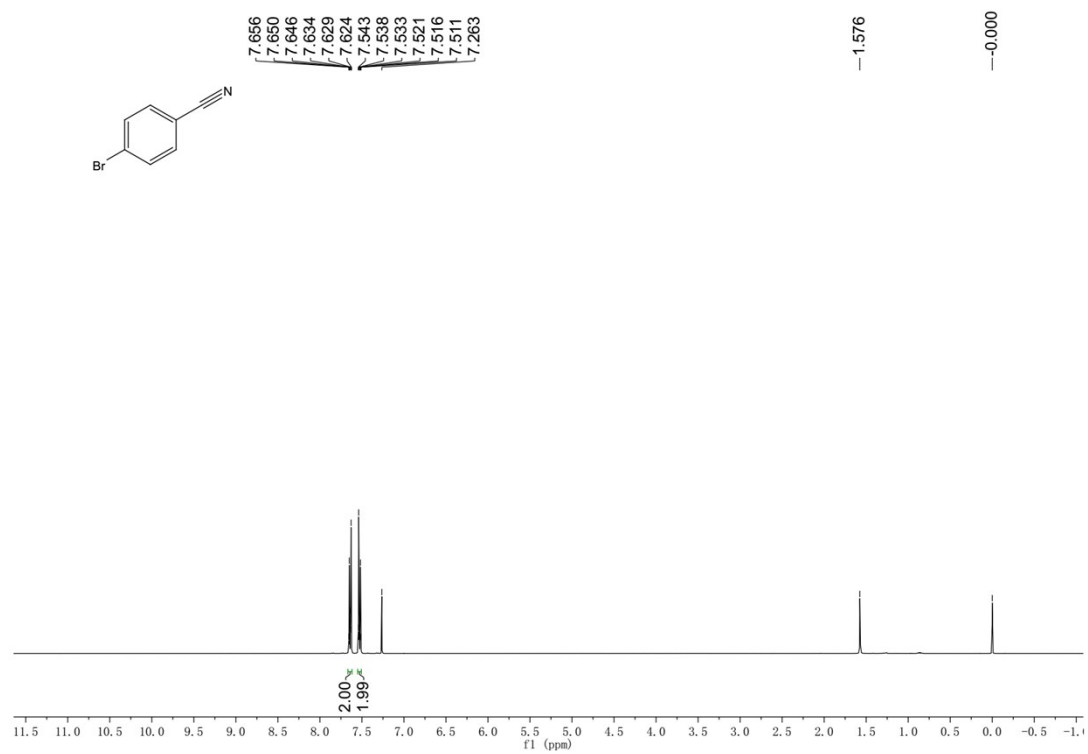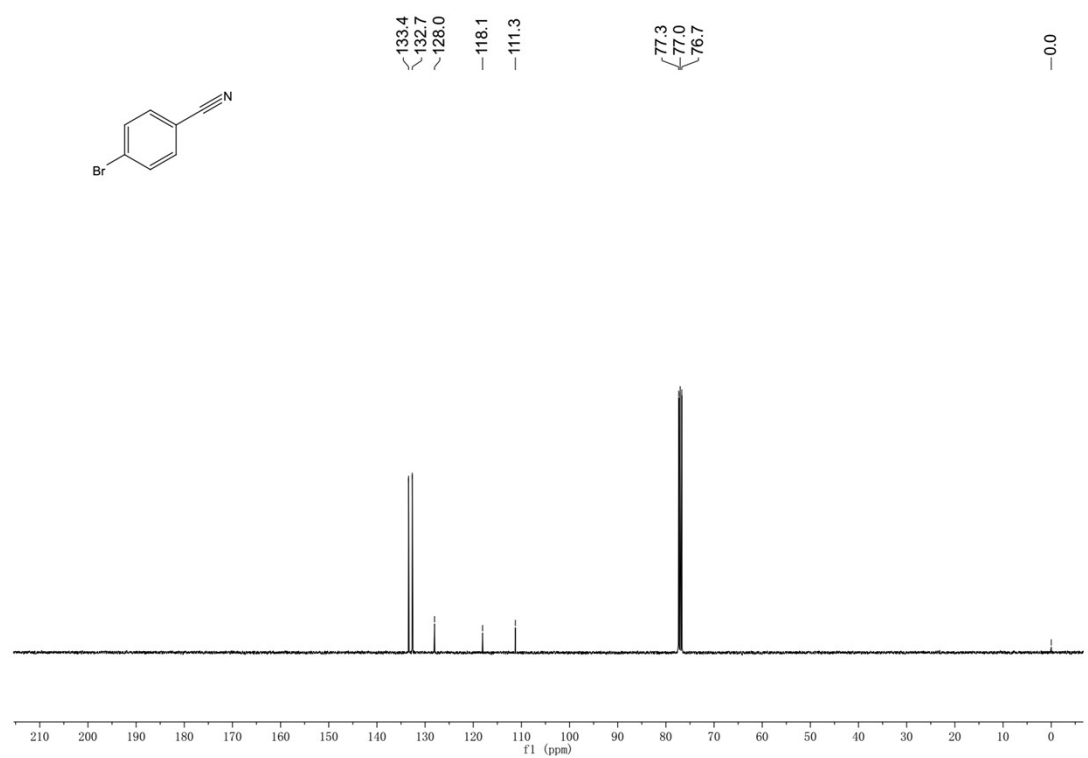

2p

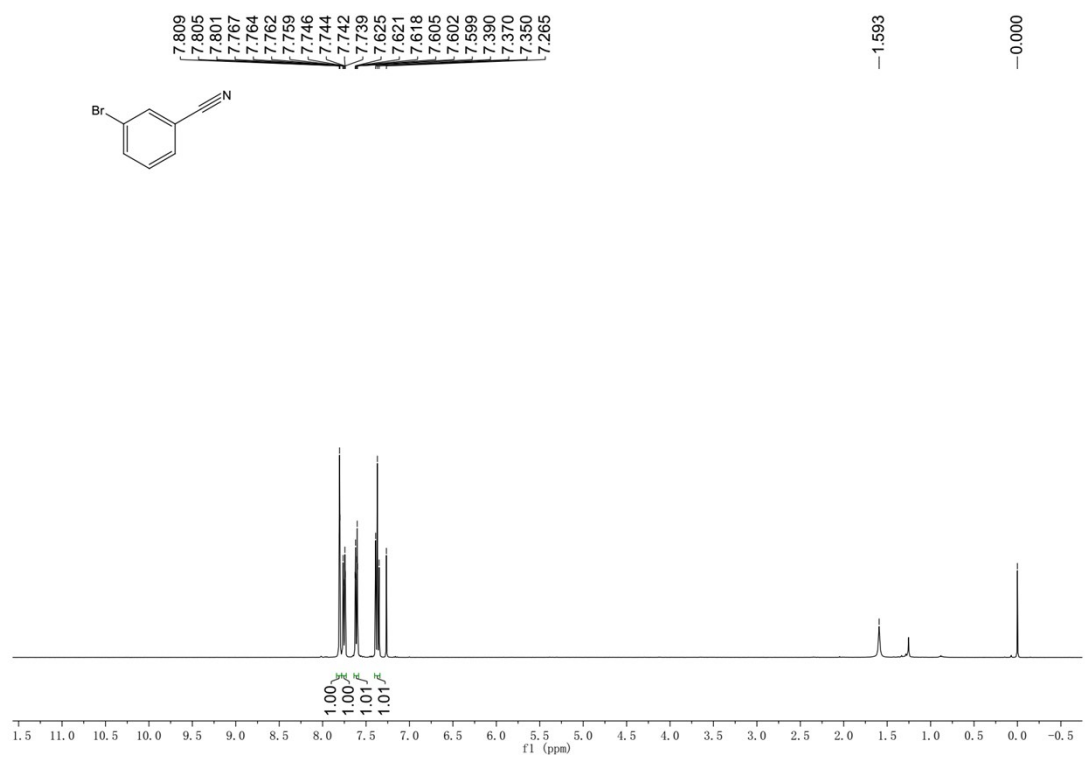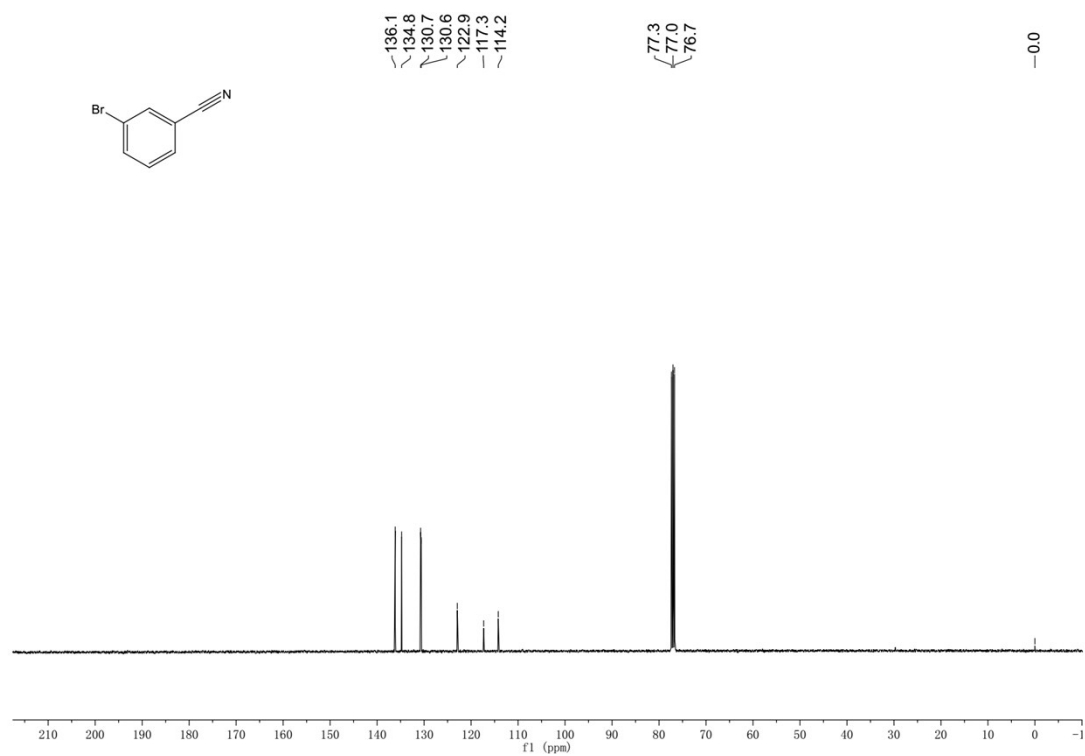

2q

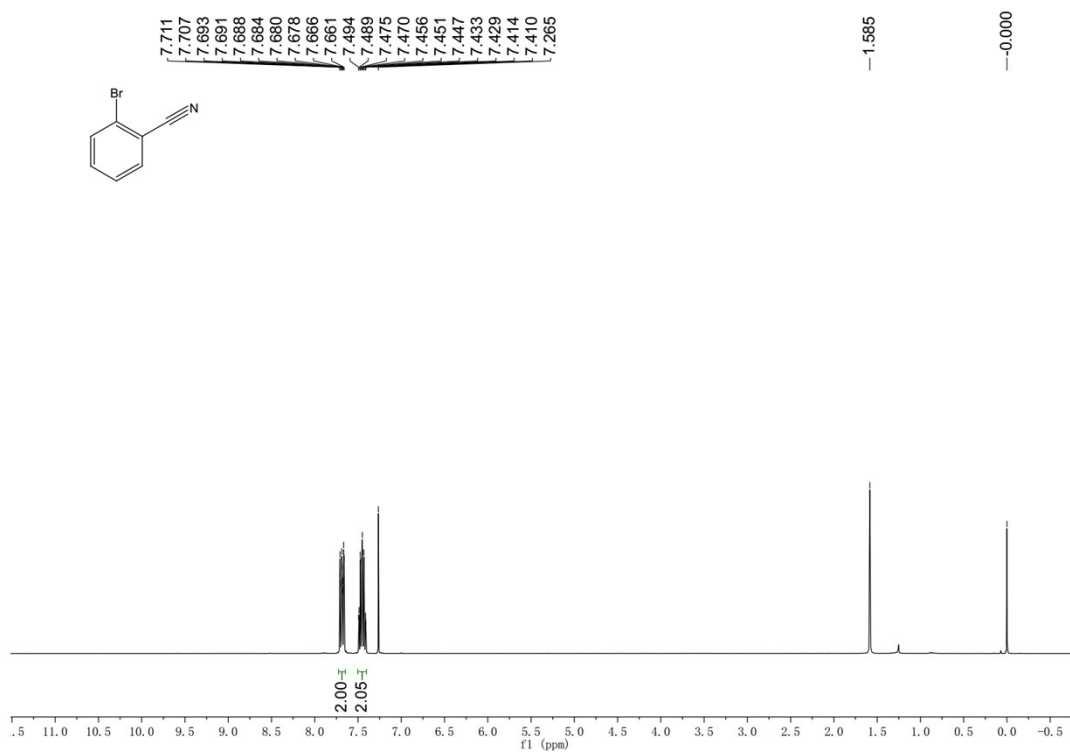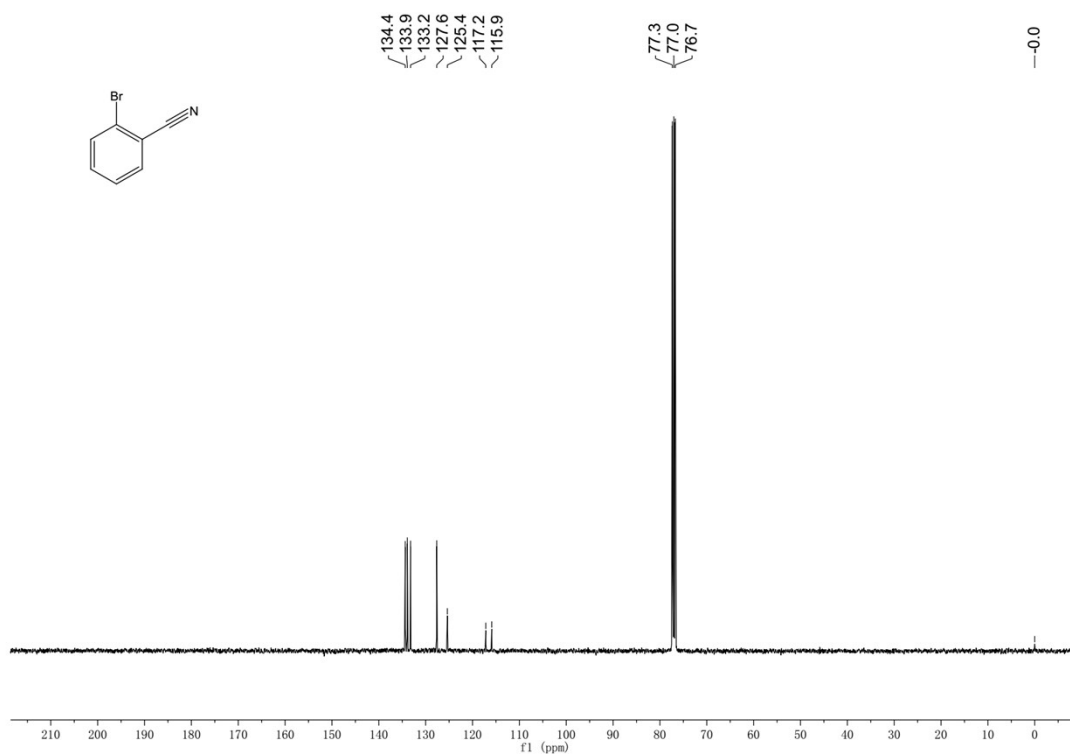

2r

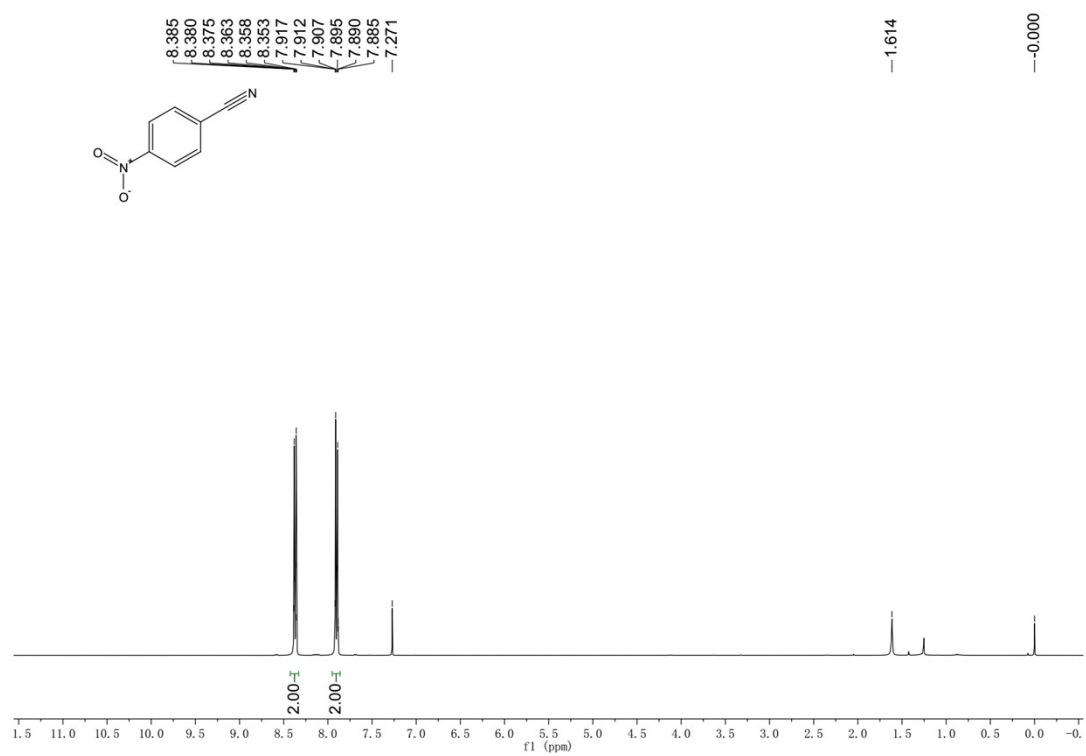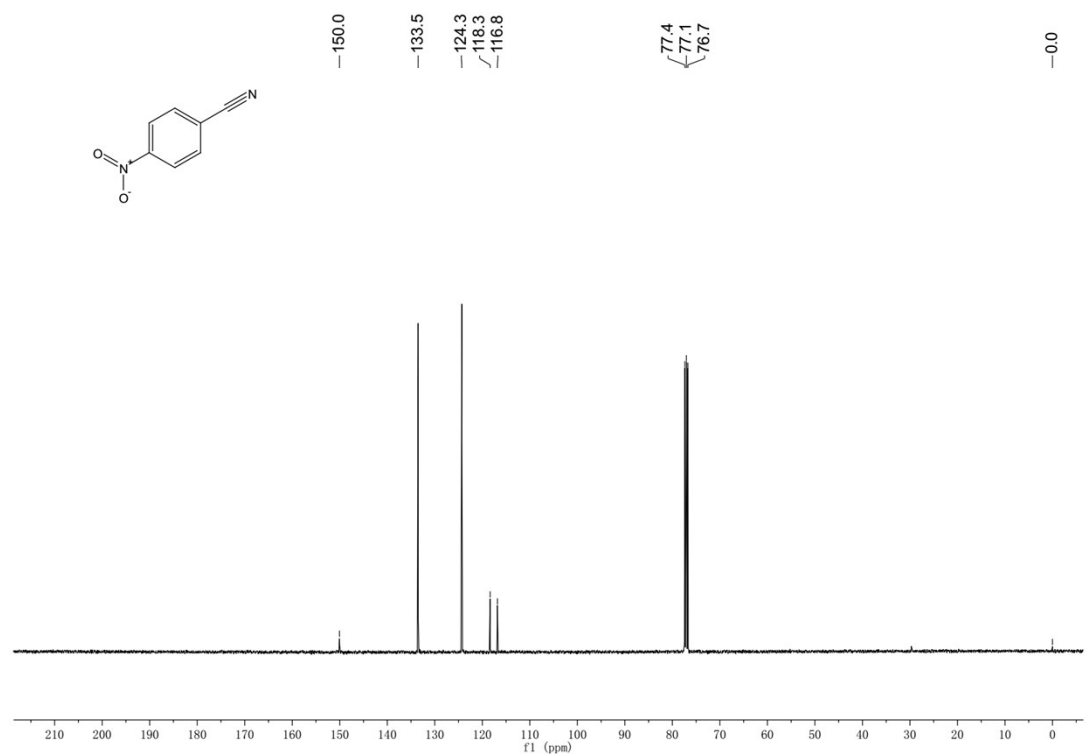

2s

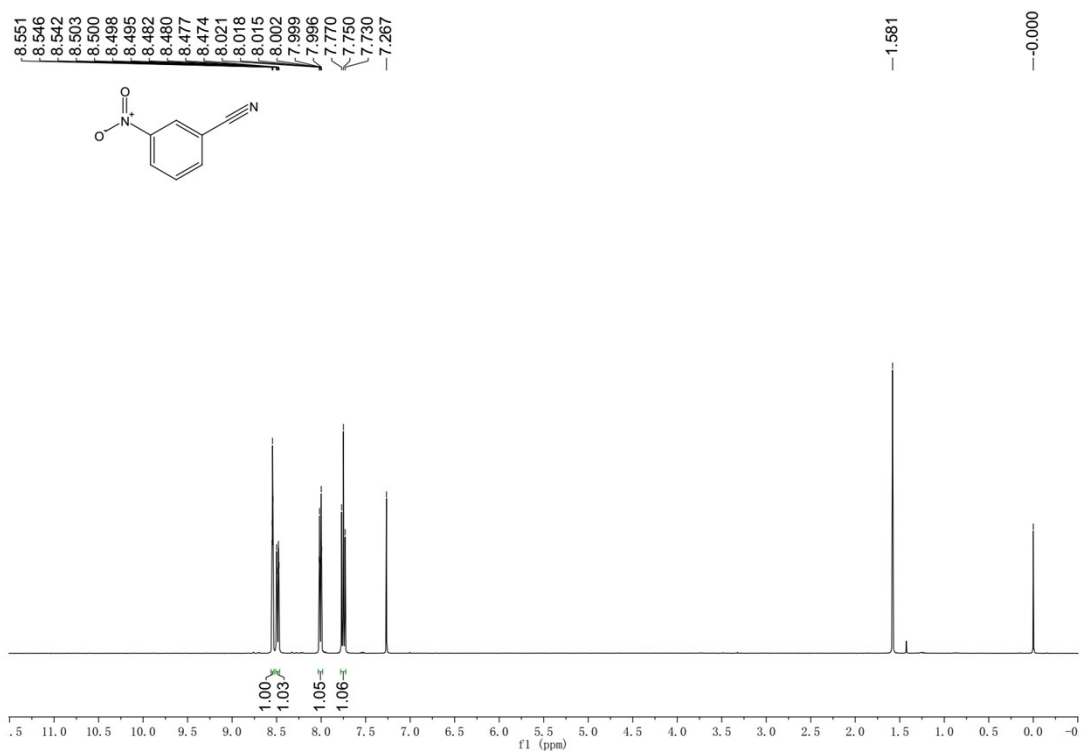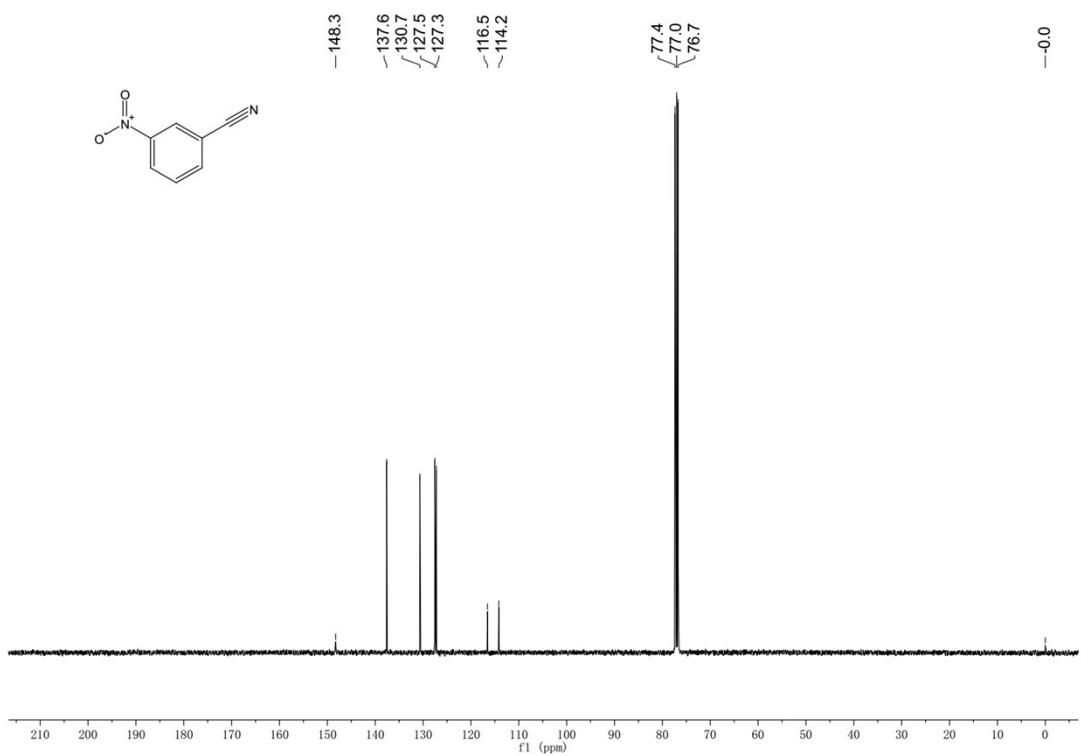

2t

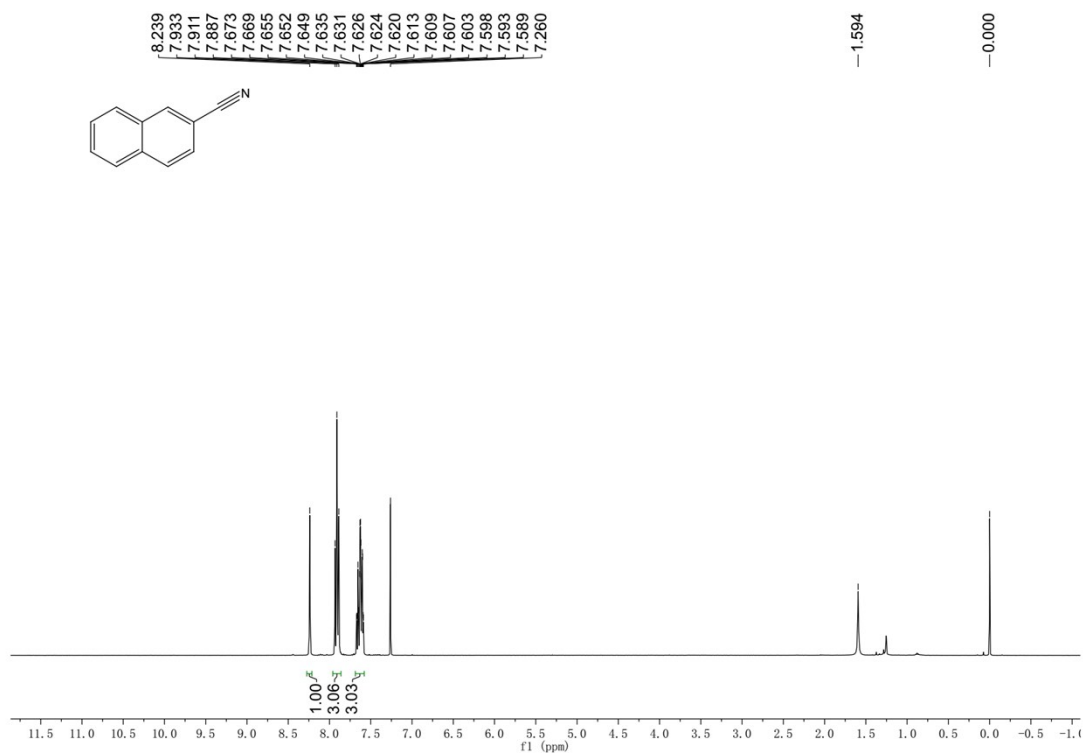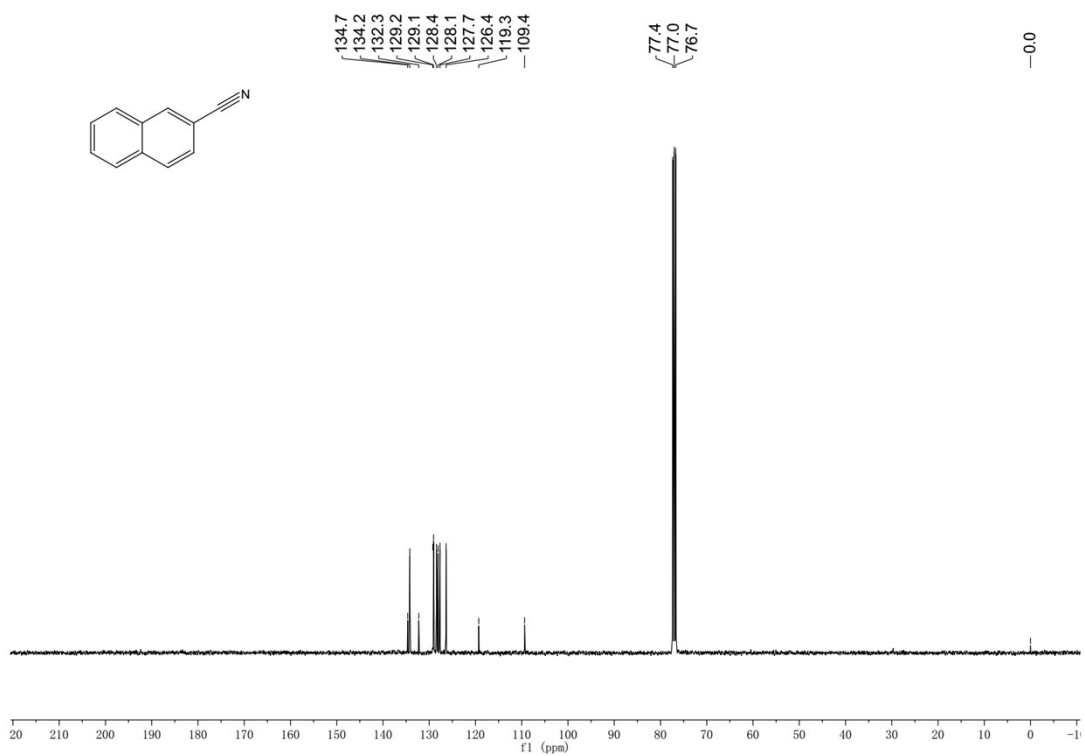

2u

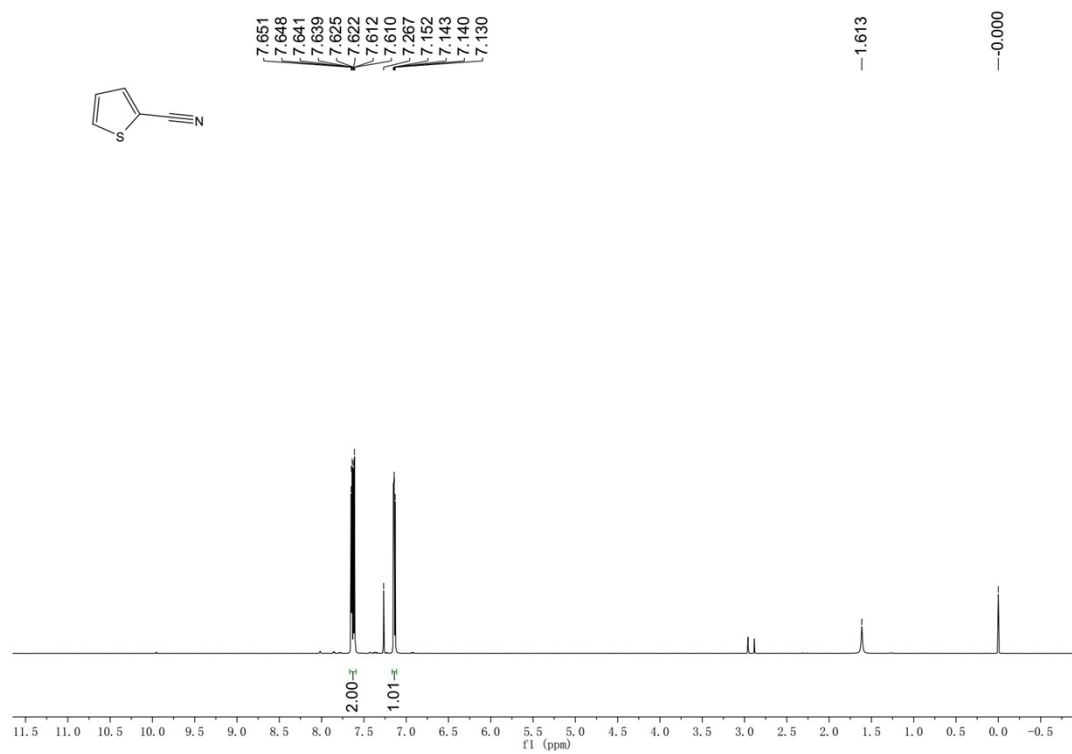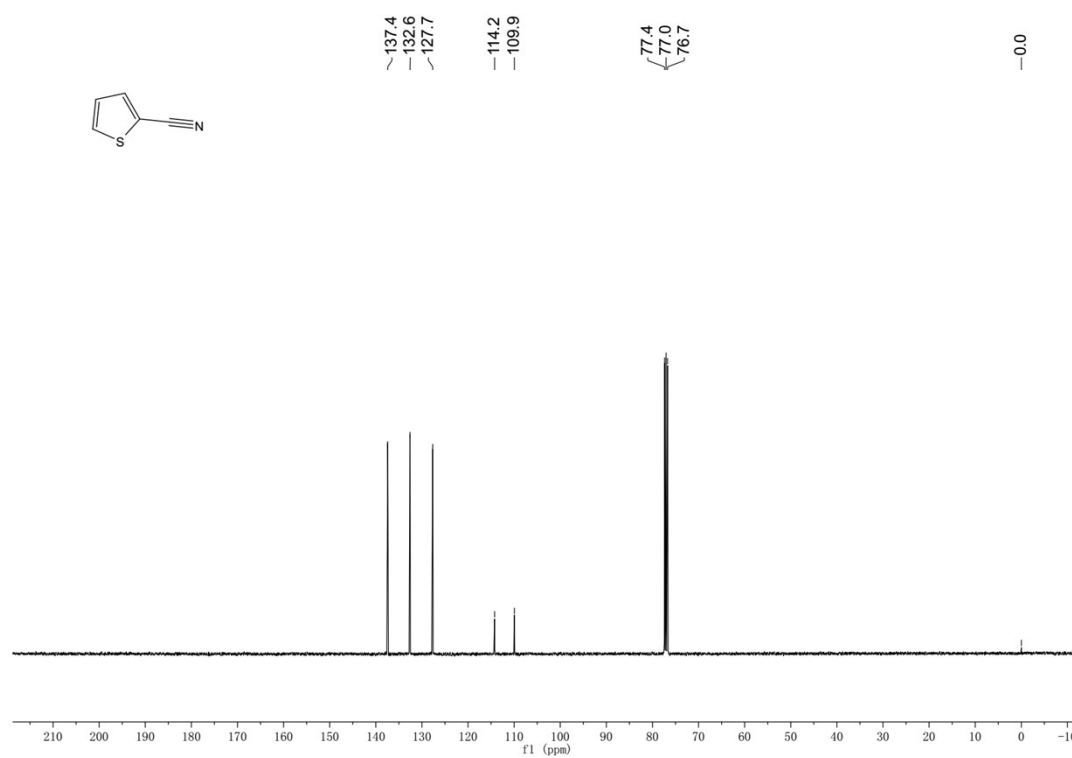



2v

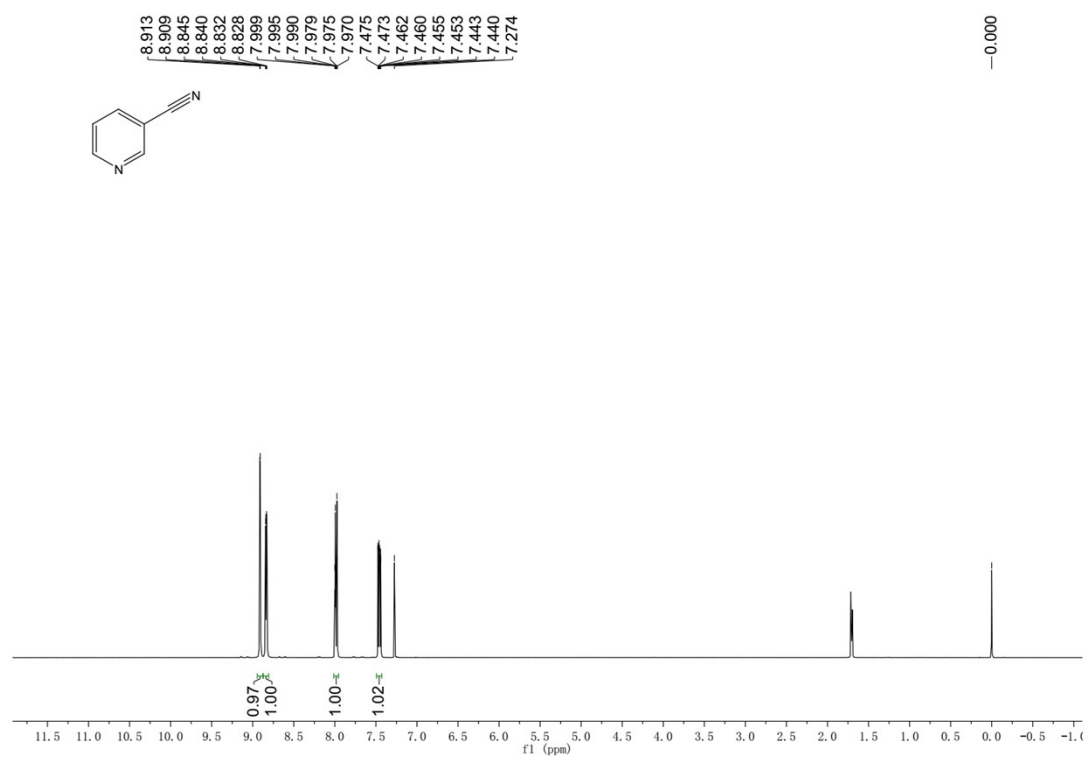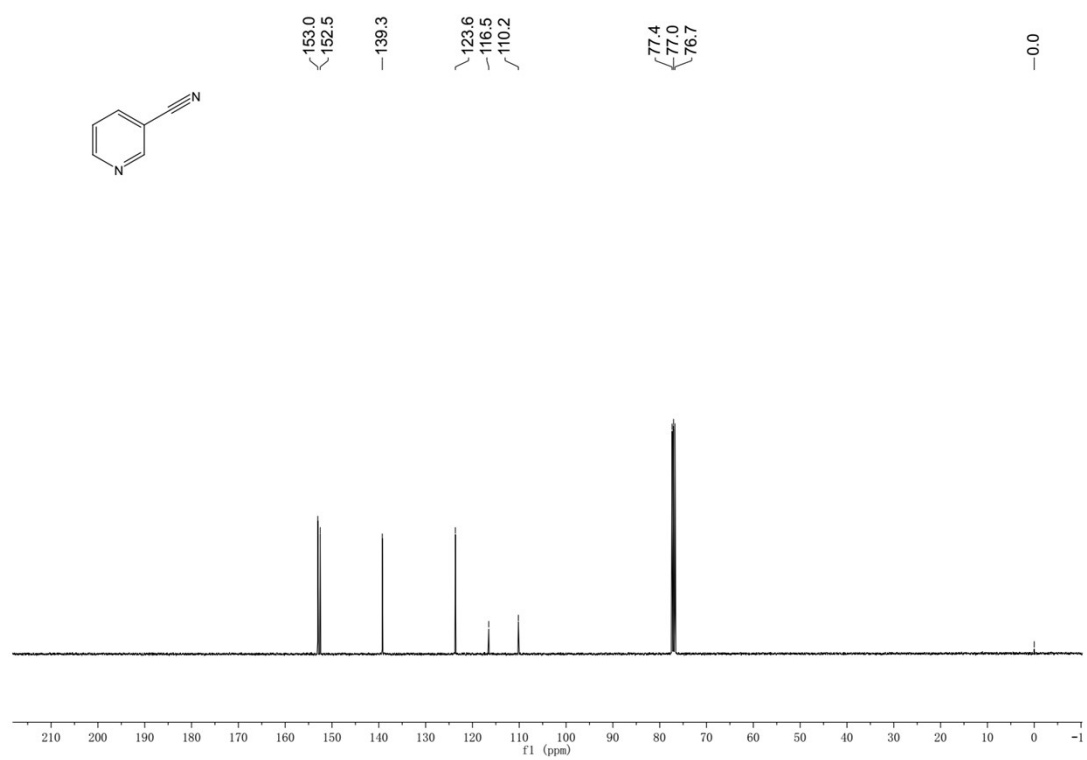

2w

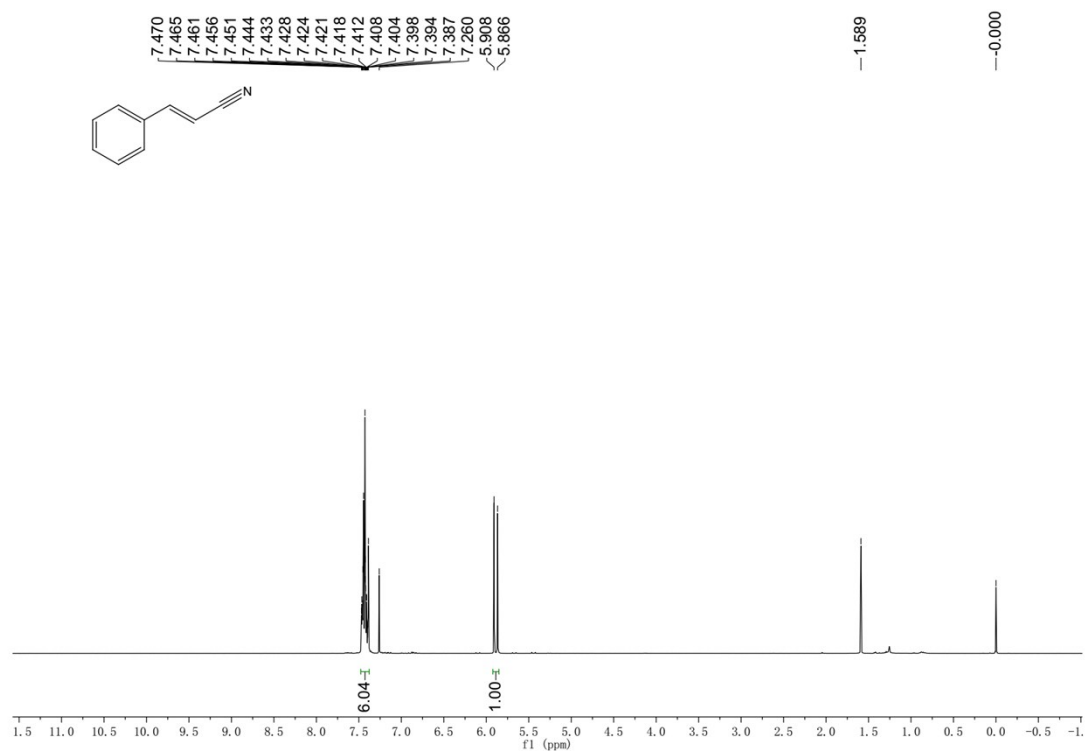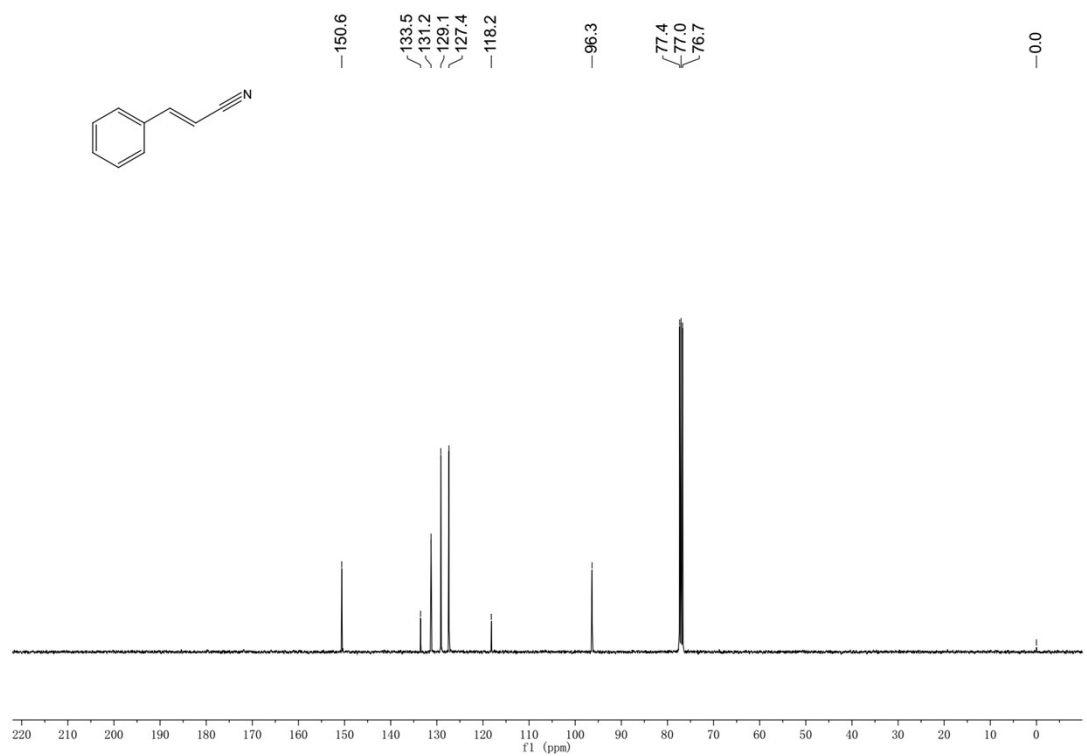

## References

- 1 (a) S. Morales, F. G. Guijarro, J. L. García Ruano and M. B. Cid, A General Aminocatalytic Method for the Synthesis of Aldimines, *J. Am. Chem. Soc.*, 2014, **136**, 1082-1089; (b) X. Lu and U. Schneider, Aza-Morita-Baylis-Hillman reactions catalyzed by a cyclopropenyliiden, *Chem. Commun.*, 2016, **52**, 12980-12983; (c) L. Huang and W. D. Wulff, Catalytic Asymmetric Synthesis of Trisubstituted Aziridines, *J. Am. Chem. Soc.*, 2011, **133**, 8892-8895; (d) Z. Cui, H.-J. Yu, R.-F. Yang, W.-Y. Gao, C.-G. Feng and G.-Q. Lin, Highly Enantioselective Arylation of N-Tosylalkylaldimines Catalyzed by Rhodium-Diene Complexes, *J. Am. Chem. Soc.*, 2011, **133**, 12394-12397.
- 2 G.W. Trucks, M.J. Frisch, H.B. Schlegel, G.E. Scuseria, M.A. Robb, J.R. Cheeseman, G. Scalmani, V. Barone, B. Mennucci, G.A. Petersson, H. Nakatsuji, M. Caricato, X. Li, H.P. Hratchian, A.F. Izmaylov, J. Bloino, G. Zheng, J.L. Sonnenberg, M. Hada, M. Ehara, K. Toyota, R. Fukuda, J. Hasegawa, M. Ishida, T. Nakajima, Y. Honda, O. Kitao, H. Nakai, T. Vreven, J.A. Montgomery, Jr, J.E. Peralta, F. Ogliaro, M. Bearpark, J.J. Heyd, E. Brothers, K.N. Kudin, V.N. Staroverov, T. Keith, R. Kobayashi, J. Normand, K. Raghavachari, A. Rendell, J.C. Burant, S.S. Iyengar, J. Tomasi, M. Cossi, N. Rega, J.M. Millam, M. Klene, J.E. Knox, J.B. Cross, V. Bakken, C. Adamo, J. Jaramillo, R. Gomperts, R.E. Stratmann, O. Yazyev, A.J. Austin, R. Cammi, C. Pomelli, J.W. Ochterski, R.L. Martin, K. Morokuma, V.G. Zakrzewski, G.A. Voth, P. Salvador, J.J. Dannenberg, S. Dapprich, A.D. Daniels, O. Farkas, J.B. Foresman, J.V. Ortiz, J. Cioslowski, D.J. Fox, Revision C.01, (2010).
- 3 (a) Y. Zhao and D. G. Truhlar, Exploring the Limit of Accuracy of the Global Hybrid Meta Density Functional for Main-Group Thermochemistry, Kinetics, and Noncovalent Interactions, Density Functionals with Broad Applicability in Chemistry, *J. Chem. Theory Comput.*, 2008, **4**, 1849-1868; (b) Y. Zhao and D. G. Truhlar, Density Functionals with Broad Applicability in Chemistry, *Acc. Chem. Res.*, 2008, **41**, 157-167.
- 4 (a) R. Ding, Y. Liu, M. Han, W. Jiao, J. Li, H. Tian and B. Sun, Synthesis of Nitriles from Primary Amides or Aldoximes under Conditions of a Catalytic Swern Oxidation, *J. Org. Chem.*, 2018, **83**, 12939-12944; (b) T. Zou, X. Yu, X. Feng and M. Bao, An Efficient Transformation of Primary Halides into Nitriles Through Palladium-Catalyzed Hydrogen Transfer Reaction, *Chem. Commun.*, 2015, **51**, 10714-10717; (c) G. Zhang, X. Ren, J. Chen, M. Hu and J. Cheng, Copper-Mediated Cyanation of Aryl Halide with the Combined Cyanide Source, *Org. Lett.*, 2011, **13**, 5004-5007; (d) J. R. Coombs, K. J. Fraunhoffer, E. M. Simmons, J. M. Stevens, S. R. Wisniewski and M. Yu, Improving Robustness: In Situ Generation of a Pd(0) Catalyst for the Cyanation of Aryl Bromides, *J. Org. Chem.*, 2017, **82**, 7040-7044; (e) Y. Suzuki, T. Yoshino, K. Moriyama and H. Togo, Direct Transformation of N,N-Disubstituted Amides and Isopropyl Esters to Nitriles, *Tetrahedron*, 2011, **67**, 3809-3814; (f) C. Zhu, F. Chen, C. Liu, H. Zeng, Z. Yang, W. Wu and H. Jiang, Copper-Catalyzed Unstrained C-C Single Bond Cleavage of Acyclic Oxime Acetates Using Air: An Internal Oxidant-Triggered Strategy toward Nitriles and Ketones, *J. Org. Chem.*, 2018, **83**, 14713-14722; (g) G. Ishii, K. Moriyama and H. Togo, Transformation of Aromatic Bromides into Aromatic Nitriles via Formations of Grignard Reagents and Their DMF Adducts, *Tetrahedron Lett.*, 2011, **52**, 2404-2406; (h) W. Zhou, L. Zhang and N. Jiao, Direct Transformation of Methyl Arenes to Aryl Nitriles at Room Temperature, *Angew. Chem., Int. Ed.*, 2009, **48**, 7094-7097; (i) A. Tlili, F. Monnier and M. Taillefer, Selective One-Pot Access to Symmetrical or Unsymmetrical Diaryl Ethers by Copper-Catalyzed Double Arylation of a Simple Oxygen Source, *Chem. - Eur. J.*, 2010, **16**, 12299-12302; (j) P. Anbarasan, H. Neumann and M. Beller, A Novel and Convenient Synthesis of Benzonitriles: Electrophilic Cyanation of Aryl and Heteroaryl Bromides, *Chem. - Eur. J.*, 2011, **17**, 4217-4222.
